# Supplementary material
Source: publisher site journal article supplement (https://www.dovepress.com/get_supplementary_file.php?f=330054.xlsx)
Supplement: Supplementary file 1 [file get_supplementary_file.php]

## Sheet: WT_XC_20180715_all abundance
PG.ProteinAccessions	PG.ProteinDescriptions	[1] 15_180708002629.raw.PG.Quantity	[2] 14_180707223815.raw.PG.Quantity	[3] 13_180707205007.raw.PG.Quantity	[4] 12_180707183048.raw.PG.Quantity	[5] 11_180707164238.raw.PG.Quantity	[6] 10_180707145426.raw.PG.Quantity	[7] 9_180707120345.raw.PG.Quantity	[8] 8_180707101535.raw.PG.Quantity	[9] 7_180707082721.raw.PG.Quantity	[10] 6_180707034807.raw.PG.Quantity	[11] 5_180707015957.raw.PG.Quantity	[12] 4_180707001131.raw.PG.Quantity	[13] 3_180706215129.raw.PG.Quantity	[14] 2_180706200303.raw.PG.Quantity	[15] 1_180706181445.raw.PG.Quantity	[16] 15.raw.PG.Quantity	[17] 14.raw.PG.Quantity	[18] 13.raw.PG.Quantity	[19] 12.raw.PG.Quantity	[20] 11.raw.PG.Quantity	[21] 10.raw.PG.Quantity	[22] 9.raw.PG.Quantity	[23] 8.raw.PG.Quantity	[24] 7.raw.PG.Quantity	[25] 6.raw.PG.Quantity	[26] 5.raw.PG.Quantity	[27] 4.raw.PG.Quantity	[28] 3.raw.PG.Quantity	[29] 2.raw.PG.Quantity	[30] 1.raw.PG.Quantity
B2RPV6	Multimerin-1	Filtered	Filtered	Filtered	401398	Filtered	Filtered	200083	Filtered	Filtered	Filtered	Filtered	Filtered	Filtered	Filtered	Filtered	Filtered	Filtered	454139	382509	527062	512838	222588	Filtered	Filtered	Filtered	298449	Filtered	Filtered	204781	299108
C0HKE1;C0HKE2;C0HKE3;C0HKE4;C0HKE5;C0HKE6;C0HKE7;C0HKE8;C0HKE9;P0C0S6;P27661;Q3THW5;Q64522;Q64523;Q6GSS7;Q8BFU2;Q8CGP5;Q8CGP6;Q8CGP7;Q8R1M2	Histone H2A type 1-B;Histone H2A type 1-C;Histone H2A type 1-D;Histone H2A type 1-E;Histone H2A type 1-G;Histone H2A type 1-I;Histone H2A type 1-N;Histone H2A type 1-O;Histone H2A type 1-P;Histone H2A.Z;Histone H2AX;Histone H2A.V;Histone H2A type 2-B;Histone H2A type 2-C;Histone H2A type 2-A;Histone H2A type 3;Histone H2A type 1-F;Histone H2A type 1-H;Histone H2A type 1-K;Histone H2A.J	Filtered	Filtered	Filtered	Filtered	967543	Filtered	Filtered	Filtered	1133633	Filtered	Filtered	Filtered	Filtered	173775	Filtered	110053	Filtered	Filtered	Filtered	Filtered	318190	28131	Filtered	1.3774e+06	Filtered	Filtered	Filtered	264541	Filtered	Filtered
O09131	Glutathione S-transferase omega-1	Filtered	Filtered	Filtered	1	Filtered	Filtered	207.522	Filtered	1.19691e+06	Filtered	Filtered	2.13581	Filtered	Filtered	Filtered	Filtered	Filtered	712.049	Filtered	Filtered	Filtered	354.364	Filtered	1357263	1	Filtered	Filtered	Filtered	Filtered	Filtered
O70554;O70555;O70558;O70559;O70562	Small proline-rich protein 2B;Small proline-rich protein 2D;Small proline-rich protein 2G;Small proline-rich protein 2H;Small proline-rich protein 2K	Filtered	Filtered	Filtered	Filtered	Filtered	34942.9	Filtered	Filtered	Filtered	Filtered	Filtered	8725.12	Filtered	Filtered	Filtered	Filtered	Filtered	Filtered	Filtered	6235.16	65315.9	Filtered	Filtered	Filtered	Filtered	Filtered	9260.32	Filtered	9320.67	Filtered
P00920	Carbonic anhydrase 2	Filtered	177296	33119	11347.6	Filtered	Filtered	17208.8	Filtered	299279	57143.2	57137.7	77826.1	Filtered	Filtered	39964.4	Filtered	Filtered	1	24402	Filtered	Filtered	10835.3	Filtered	417019	1	1	Filtered	Filtered	300058	18053
P02301;P68433;P84228;P84244	Histone H3.3C;Histone H3.1;Histone H3.2;Histone H3.3	Filtered	44703.2	138389	Filtered	332281	114901	1	Filtered	1.04413e+06	1	71400.4	115567	Filtered	Filtered	131692	Filtered	Filtered	113224	Filtered	197379	137384	58229.1	Filtered	903474	Filtered	Filtered	114897	Filtered	107097	207390
P02798	Metallothionein-2	Filtered	Filtered	Filtered	Filtered	Filtered	Filtered	5264.54	5705.27	7022.96	7458.61	17537	13158.6	3558.58	Filtered	Filtered	6663.75	Filtered	Filtered	Filtered	3238.98	Filtered	Filtered	Filtered	11485.3	Filtered	11063.3	15302.8	Filtered	8936	Filtered
P05064	Fructose-bisphosphate aldolase A	Filtered	Filtered	Filtered	Filtered	Filtered	Filtered	Filtered	Filtered	101283	Filtered	Filtered	Filtered	Filtered	Filtered	Filtered	Filtered	Filtered	24046.1	Filtered	Filtered	Filtered	4991.28	Filtered	120158	Filtered	Filtered	Filtered	Filtered	25146.4	Filtered
P05208	Chymotrypsin-like elastase family member 2A	Filtered	Filtered	Filtered	Filtered	Filtered	Filtered	Filtered	51499.4	Filtered	Filtered	Filtered	Filtered	Filtered	Filtered	Filtered	Filtered	Filtered	Filtered	Filtered	Filtered	Filtered	Filtered	46674.9	Filtered	Filtered	Filtered	Filtered	Filtered	Filtered	Filtered
P12658	Calbindin	Filtered	Filtered	Filtered	Filtered	Filtered	Filtered	Filtered	Filtered	64453.8	Filtered	Filtered	Filtered	Filtered	Filtered	Filtered	Filtered	242.405	Filtered	Filtered	Filtered	Filtered	9427.2	Filtered	172019	Filtered	Filtered	Filtered	Filtered	Filtered	Filtered
P14152	Malate dehydrogenase, cytoplasmic	Filtered	Filtered	Filtered	20486.6	Filtered	Filtered	41410.4	Filtered	499239	Filtered	Filtered	Filtered	Filtered	Filtered	Filtered	Filtered	Filtered	Filtered	Filtered	Filtered	Filtered	61996.4	Filtered	542287	Filtered	Filtered	Filtered	Filtered	Filtered	Filtered
P17742	Peptidyl-prolyl cis-trans isomerase A	Filtered	Filtered	Filtered	Filtered	Filtered	Filtered	Filtered	Filtered	69673.1	Filtered	Filtered	Filtered	Filtered	Filtered	Filtered	Filtered	Filtered	Filtered	Filtered	Filtered	Filtered	Filtered	Filtered	78483.9	Filtered	Filtered	Filtered	Filtered	Filtered	Filtered
P18761	Carbonic anhydrase 6	Filtered	Filtered	27264.9	5553.36	Filtered	Filtered	18887.3	140410	32447.3	53997.8	44681.8	62713.6	16061.1	Filtered	Filtered	3257.89	81303.5	8725.93	65888.5	Filtered	67201.6	50488	162115	15466.9	58449.7	37644.9	54013.6	32134.3	Filtered	Filtered
P24822	Intestinal-type alkaline phosphatase	Filtered	Filtered	Filtered	Filtered	Filtered	Filtered	476.652	51803.5	12078.5	Filtered	Filtered	Filtered	Filtered	Filtered	Filtered	Filtered	Filtered	Filtered	Filtered	Filtered	Filtered	1	82818.9	15595	Filtered	Filtered	Filtered	Filtered	Filtered	Filtered
P27773	Protein disulfide-isomerase A3	Filtered	Filtered	Filtered	Filtered	Filtered	Filtered	Filtered	Filtered	28065.4	163879	Filtered	Filtered	Filtered	Filtered	Filtered	1	Filtered	Filtered	Filtered	Filtered	Filtered	Filtered	1.05288	Filtered	143043	Filtered	Filtered	Filtered	Filtered	Filtered
P31809	Carcinoembryonic antigen-related cell adhesion molecule 1	Filtered	Filtered	Filtered	Filtered	Filtered	Filtered	Filtered	92319.6	25731.6	Filtered	Filtered	Filtered	Filtered	Filtered	Filtered	Filtered	Filtered	Filtered	Filtered	Filtered	Filtered	1	36992.9	Filtered	Filtered	Filtered	Filtered	Filtered	Filtered	Filtered
P42567	Epidermal growth factor receptor substrate 15	Filtered	Filtered	150286	Filtered	Filtered	361775	Filtered	1614631	392997	341289	Filtered	585596	Filtered	Filtered	Filtered	Filtered	313945	135449	Filtered	Filtered	229172	11089.9	1.53137e+06	208332	Filtered	34714.9	535439	Filtered	112601	25019.2
Q06318	Uteroglobin	Filtered	Filtered	Filtered	166552	Filtered	Filtered	289174	Filtered	623257	544659	280114	1.677e+06	Filtered	7739025	671535	165433	Filtered	Filtered	150114	Filtered	Filtered	Filtered	433296	889092	297163	Filtered	1.71443e+06	Filtered	Filtered	Filtered
Q61092	Laminin subunit gamma-2	Filtered	Filtered	Filtered	Filtered	Filtered	Filtered	27647	9886.55	Filtered	16311.2	22142.6	Filtered	Filtered	Filtered	Filtered	Filtered	Filtered	Filtered	23019.5	5872.9	12997.1	33759.8	Filtered	6109.78	Filtered	20901.4	Filtered	Filtered	Filtered	Filtered
Q61865	Melanoma-derived growth regulatory protein	Filtered	Filtered	242854	Filtered	Filtered	Filtered	45986.1	84226	56690.8	123723	162188	Filtered	Filtered	Filtered	Filtered	Filtered	Filtered	Filtered	Filtered	Filtered	Filtered	Filtered	38765.7	Filtered	118568	98402.6	Filtered	Filtered	Filtered	Filtered
Q62426	Cystatin-B	Filtered	Filtered	Filtered	Filtered	Filtered	Filtered	22697.5	Filtered	Filtered	20230.7	Filtered	Filtered	Filtered	Filtered	Filtered	Filtered	Filtered	Filtered	5074.2	Filtered	Filtered	26110.2	Filtered	Filtered	36065	Filtered	Filtered	Filtered	Filtered	Filtered
Q6UGQ3	Secretoglobin family 2B member 2	Filtered	Filtered	Filtered	Filtered	Filtered	Filtered	Filtered	51988.9	708095	Filtered	31838.8	Filtered	Filtered	Filtered	Filtered	Filtered	Filtered	Filtered	Filtered	Filtered	Filtered	Filtered	23356.4	690654	48322.1	Filtered	Filtered	Filtered	Filtered	Filtered
Q80Z19	Mucin-2 (Fragments)	Filtered	Filtered	Filtered	Filtered	Filtered	Filtered	18498.9	569168	167847	Filtered	Filtered	Filtered	Filtered	Filtered	Filtered	Filtered	Filtered	Filtered	Filtered	Filtered	Filtered	30666.2	391400	159771	Filtered	Filtered	Filtered	Filtered	Filtered	Filtered
Q8R464	Cell adhesion molecule 4	Filtered	Filtered	153699	139497	480821	238730	99419.2	246412	268482	113771	117634	460704	236809	161438	257149	125174	262252	Filtered	157793	480227	297195	51855.5	193641	128803	62014.5	137713	186930	Filtered	225686	214099
Q91X79	Chymotrypsin-like elastase family member 1	Filtered	Filtered	Filtered	Filtered	Filtered	Filtered	4553.76	97340.8	99742.6	Filtered	Filtered	Filtered	Filtered	Filtered	Filtered	Filtered	Filtered	Filtered	Filtered	Filtered	Filtered	Filtered	139948	97258.7	Filtered	Filtered	Filtered	Filtered	Filtered	Filtered
Q9CQ52	Chymotrypsin-like elastase family member 3B	Filtered	Filtered	Filtered	Filtered	Filtered	Filtered	19197.4	813386	401417	Filtered	Filtered	Filtered	Filtered	Filtered	Filtered	Filtered	Filtered	Filtered	Filtered	Filtered	Filtered	11376.4	702533	595932	Filtered	Filtered	Filtered	Filtered	Filtered	Filtered
Q9D7S0	Ly6/PLAUR domain-containing protein 8	Filtered	Filtered	Filtered	Filtered	Filtered	Filtered	2355.13	21941.8	10227.8	Filtered	Filtered	Filtered	Filtered	Filtered	Filtered	Filtered	Filtered	Filtered	Filtered	Filtered	Filtered	Filtered	27963.7	13291.9	Filtered	Filtered	Filtered	Filtered	Filtered	Filtered
Q9D7Z6	Calcium-activated chloride channel regulator 1	Filtered	Filtered	Filtered	Filtered	Filtered	Filtered	54139.5	581561	147276	Filtered	Filtered	Filtered	Filtered	Filtered	Filtered	Filtered	Filtered	1	Filtered	Filtered	Filtered	63820.2	476456	78538	Filtered	Filtered	Filtered	Filtered	Filtered	Filtered
Q9DCV7	Keratin, type II cytoskeletal 7	Filtered	Filtered	Filtered	Filtered	Filtered	Filtered	Filtered	Filtered	113700	Filtered	Filtered	Filtered	Filtered	Filtered	Filtered	Filtered	Filtered	Filtered	Filtered	Filtered	Filtered	Filtered	Filtered	100772	Filtered	Filtered	Filtered	Filtered	Filtered	Filtered
Q9ESD1	Prostasin	Filtered	485587	633869	276236	3.46915e+06	313382	378356	416674	230302	Filtered	1.42104e+06	772726	3.14981e+06	323220	230091	1	2.35351e+06	421087	221486	159293	438279	130534	224465	295730	330096	1.34989e+06	3328775	2.08134e+06	210551	1.33214e+06
Q9QUH0	Glutaredoxin-1	Filtered	Filtered	Filtered	Filtered	56790.8	Filtered	142337	Filtered	228761	Filtered	Filtered	112325	Filtered	Filtered	Filtered	275378	Filtered	Filtered	Filtered	Filtered	256794	190950	Filtered	430283	93592.6	Filtered	Filtered	Filtered	Filtered	Filtered
Q9R007	C-type lectin domain family 5 member A	Filtered	Filtered	9630.01	Filtered	Filtered	Filtered	19109.1	Filtered	Filtered	Filtered	Filtered	Filtered	Filtered	Filtered	Filtered	Filtered	Filtered	Filtered	Filtered	Filtered	Filtered	29721.3	1	Filtered	1	Filtered	Filtered	Filtered	Filtered	Filtered
Q9R0G6	Cartilage oligomeric matrix protein	Filtered	37833.5	10335.6	41391.1	Filtered	Filtered	10964.4	Filtered	Filtered	163148	91802.3	158049	64092.9	Filtered	46919.4	74047.9	73027.6	Filtered	Filtered	Filtered	Filtered	6638.48	Filtered	23633.9	153820	83565.8	81296.4	161154	55784.6	72109.2
Q9Z0W1	Tumor necrosis factor receptor superfamily member 16	Filtered	157868	94565.8	Filtered	Filtered	Filtered	Filtered	69834.2	Filtered	85706.8	110025	Filtered	Filtered	Filtered	Filtered	79387	Filtered	122858	Filtered	Filtered	126401	84195.3	Filtered	57963.6	79168.8	65604.7	Filtered	Filtered	88040	135183
Q9Z319	Atrial natriuretic peptide-converting enzyme	Filtered	31912.9	71862	54323.7	20807.5	Filtered	45132.4	20331.7	10757.9	45947.6	77839	Filtered	3241.95	Filtered	Filtered	Filtered	Filtered	172931	Filtered	Filtered	Filtered	9893.41	5805.73	Filtered	21760.6	34937.2	Filtered	Filtered	Filtered	Filtered
A2BIM8;P02762;P04938	Major urinary protein 18;Major urinary protein 6;Major urinary protein 11	663284608	1723462144	1355182336	721725696	2777563648	1432818048	279393792	1128722816	1674257024	710211264	987764864	2277984768	2636509184	1960448512	1972849408	556454016	2351738880	1324184960	662948672	2123913216	1739516416	313362112	1160673024	1817682816	821214016	1096063872	1707860736	2673904128	1795440000	2045418112
P04939	Major urinary protein 3	581380032	1772923776	996556416	632861120	2766862848	979924096	213477952	801200640	800590144	771278784	812410368	1174485376	2010628480	1592152448	1375564544	537950976	1693242368	764163072	645325056	2923852288	1040913280	221655056	811984256	792953664	675824896	971044672	1382910464	1660443008	1348968064	1416040192
Q5FW60	Major urinary protein 20	220047344	941364928	615194112	263548064	1208074624	1014434560	57135084	307166304	539837824	323488448	421917280	1120670208	704985600	561615936	869886720	192642912	824888704	431806432	225610288	1142372864	774009920	52989832	335519680	590933056	251322352	399433312	749970176	708758400	546213056	737258624
P03953	Complement factor D	98043232	113869912	73645576	65197492	136133376	89684512	89396128	87181800	58824456	107856736	113275016	36457984	147205152	45792284	92281984	92469032	130300376	83389456	87103056	151430640	87688200	79655232	92563024	76570424	107453216	146907248	89498000	112276072	80603016	87283376
Q91X17	Uromodulin	86926992	174670848	130588408	97707120	318175552	135818720	55894720	122881184	82405184	97553968	113942272	136838288	157882400	109591392	126403920	85992104	182834944	103794360	100222400	282195968	126583600	57655788	107954384	88035864	75747936	109842496	129652040	130816760	103776976	122328848
P15947	Kallikrein-1	81123840	118212896	93149184	72686216	150037792	105707968	68463808	113665464	86844272	106637648	87104064	166735584	139786880	202657888	103823832	77890368	99328536	87144496	79148912	141999888	89477952	57693124	114955160	97196568	100733872	94972008	106857992	142433952	96897400	91902544
P11589	Major urinary protein 2	76330480	235968880	80879704	103465032	320161856	118721448	53945724	85063536	106652016	144485136	137743680	155829616	496643168	248602768	134291936	66105836	257033488	123142656	97802480	322724640	144756912	54679516	145934512	96899120	174561392	114658920	110865936	326306176	157783696	173672992
Q3UDR8	Protein YIPF3	45642160	94806400	61412760	52616312	185711136	67992216	26696344	46633936	40775564	50368048	55780132	80057760	93458536	65102212	62504372	54445324	97417552	51423392	61675216	160079488	66654768	37041984	49636136	43542348	38898008	58698644	76551704	69868400	71329336	64324656
P07724	Serum albumin	39961216	25890346	32689952	42407624	35159800	33749144	34868592	42605656	34212928	71657352	54343884	72714464	45922784	66429820	48207916	39389776	32042680	29343038	40631840	48203552	39482544	35972204	42687916	41628256	61214032	47902136	70909856	43735960	46282020	45866772
Q8C6C9	Protein LEG1 homolog	38534136	29019330	41953732	26491074	18724344	33228778	29037036	37728260	22409796	138501280	43478240	78650864	60160248	60449132	25122870	39506148	21983876	49528756	28325280	17942060	39827372	32790442	33509982	24515510	125864936	41218320	55624840	57685276	42810712	23222814
P01132	Pro-epidermal growth factor	31445836	63682392	51620112	36906888	77404544	48691272	16604114	42792848	36033612	35189920	42339720	54899224	67648672	53260128	46547744	35970680	61396252	38992988	39504000	80153216	41657856	20766312	49611952	40580320	23948148	39661340	50744476	57763100	35438196	46004504
P61110	Kidney androgen-regulated protein	25419822	94187728	51202080	37832828	146450848	56613064	10900370	25952352	31768984	12820630	35450040	77377632	61083576	51448804	49021576	25861572	90604384	45482956	42074628	134678528	49797600	16550010	28521798	33936872	8729364	34271924	75577208	41166024	61848040	51239268
Q80T19	Hepcidin-2	25191040	10612520	9771950	8389560	83238112	7080578	9263433	22086270	2606927	12146000	8605281	2.60729e+06	24824272	10842426	16395357	24736506	11647740	8742547	7.64864e+06	104448312	6094401	9905159	21806460	936183	10279160	9725894	3.17806e+06	19340382	9057082	14074389
P49183	Deoxyribonuclease-1	24281960	55797364	27528836	45444196	71577848	29958174	20774678	53423252	23519036	32690550	34808488	24039126	42942396	24909154	30649908	22955762	61475496	23210682	34092208	66293092	37833464	19229082	58936908	28699938	22611264	32434226	24911204	45212168	17319768	26076578
Q61207	Prosaposin	21856622	57453864	37512720	33064334	50548448	35027936	14010348	34886816	34959976	29614732	23472024	32267766	49209248	63229512	35419972	22018170	55143240	38202648	32318830	47019796	26099314	17589384	34280504	41593104	25756130	25062666	33512830	45433828	35148700	30680730
P35459	Lymphocyte antigen 6D	19689304	23741404	21992036	18237032	48327236	31083430	13542743	21379126	20166810	17333828	15363770	25660970	26212600	25922860	31447542	17814598	24341642	18432198	18384304	46004864	29964882	13583174	20825350	21415784	14050841	17355360	24897132	24207664	25633426	30192834
Q07456	Protein AMBP	18102370	25608646	15087511	14291995	35327064	16127683	12349080	12285813	23987790	14495769	20152604	33033064	20843816	21656204	18517730	18097256	19543978	11312280	15670020	39256024	16149681	13142133	12983692	28586162	13870238	19135942	34326344	16821286	22212576	18370000
P28825	Meprin A subunit alpha	13851665	30872020	18443066	12857085	24827118	21029084	6.99716e+06	19835286	15116009	16197781	17003288	22628120	21873168	32446834	14055801	14840399	28390714	22097370	13530266	25697372	23519900	11498874	24521664	17876436	18224048	20180508	20050594	25201016	18427492	16174002
Q08423	Trefoil factor 1	12164338	17969490	19561514	21778880	28806960	18915212	12368430	21506776	23286820	19081912	11609634	15996376	10824809	29691482	21827440	18466064	32783070	22610138	23286866	23080872	21561690	19239806	26956464	21084362	12263597	18365264	35842016	24932622	20324096	18902352
P09803	Cadherin-1	8434183	11133173	9438035	8827588	10516096	9058050	9344393	12142194	6142641	14889690	9676373	6797035	7568044	11203949	7828891	7543766	12389256	11416019	9814992	12377818	8124973	7405801	14374967	7.83082e+06	15712195	9039124	7.52808e+06	8560096	33954960	8766537
P19221	Prothrombin	7384344	8594520	10165743	9025823	9730705	8883545	9200660	7123553	12299280	15945410	9929770	9845507	7.51464e+06	8969258	4.51875e+06	7697642	7.8848e+06	9557644	10004868	11303544	9252229	10187780	9994729	14806767	16312638	8761889	9486134	6.06128e+06	5.74724e+06	4467757
O09043	Napsin-A	7259009	55645588	31728684	26586462	38935452	16210971	10288238	22628202	22163304	18986822	21276928	17945858	54256228	45936496	26185374	5002590	57815208	15176832	15569624	38701568	16193335	4.11713e+06	22684928	24572772	10276010	20647656	19795778	34818556	10786961	28493960
Q02596	Glycosylation-dependent cell adhesion molecule 1	6.76446e+06	11032533	6.20184e+06	5.94945e+06	18547000	5.32839e+06	10080392	6.46665e+06	2.47449e+06	5.10449e+06	10406029	8894412	11477556	7.22971e+06	8865548	3456064	11545841	4.6812e+06	8393132	13538038	5326606	4.47247e+06	3.66786e+06	3.94944e+06	6.40076e+06	10729962	7636114	7692913	2.01269e+06	9005609
P04186	Complement factor B	5.74479e+06	3931575	2718989	4.81986e+06	5830181	4.01584e+06	10282504	4.10416e+06	8557290	8740910	5.33661e+06	6.87002e+06	4219362	3559066	3.01562e+06	5.05682e+06	3.54423e+06	3.20519e+06	4.96183e+06	6.62863e+06	3.24217e+06	9459608	3.30488e+06	8795534	9352020	5.96215e+06	8367358	5021279	2.00903e+06	2.93274e+06
P02816	Prolactin-inducible protein homolog	5312669	6367592	9252850	5420323	4932652	5716576	4.03337e+06	10406170	8274936	15623672	6.88077e+06	17736288	12256988	10983822	3.59239e+06	5132861	5009426	9194800	5827912	4874837	5783914	5696130	12515772	8613534	15616168	8029233	14884702	12377449	8666276	4.00407e+06
P70269	Cathepsin E	5253869	5.20503e+06	9600437	4047786	9891115	12320178	2.89497e+06	6892136	4653798	2.69488e+06	4.84668e+06	5549833	12883046	11198675	6.38293e+06	3.47533e+06	10381019	8779867	4335670	10593885	10370707	3246117	7.05373e+06	5.98215e+06	2.60798e+06	5654971	9365718	10826650	11377412	5146715
Q60590	Alpha-1-acid glycoprotein 1	4.47396e+06	2.58746e+06	2329159	4.2032e+06	4.24999e+06	3.1674e+06	7.87646e+06	2927825	5.67117e+06	20541508	10366860	16634796	2.89685e+06	6514777	3.33803e+06	4.29334e+06	2.30245e+06	2.63012e+06	3.87075e+06	4.9543e+06	2.93041e+06	9345111	3736838	5.56656e+06	22574524	10988191	14624166	2.80117e+06	4.29397e+06	3630991
Q8K1H9	Odorant-binding protein 2a	4319052	1.71868e+06	2.4814e+06	5689540	2.05628e+06	1.01083e+06	5175246	5728288	1.13377e+06	7.80779e+06	2487305	5.00476e+06	3.21611e+06	1.93772e+06	1.19158e+06	3.71959e+06	1.77377e+06	1.91851e+06	5720932	1.64251e+06	1.15141e+06	5283811	5880680	2.08119e+06	7565156	1.90817e+06	4025095	2899259	1.87818e+06	1.32889e+06
P08228	Superoxide dismutase [Cu-Zn]	3.86599e+06	2.05214e+06	2.66131e+06	2366987	2.40055e+06	3.0945e+06	2.7333e+06	4633480	3.52737e+06	4550790	3.32867e+06	3.38579e+06	4.86837e+06	6325641	4.67533e+06	3.85872e+06	1.99947e+06	2.27155e+06	2.33231e+06	2428995	3.81763e+06	2.81317e+06	5.03399e+06	4428730	4.03113e+06	3.45031e+06	5022590	6.23033e+06	4824716	3929316
O09114	Prostaglandin-H2 D-isomerase	3.83903e+06	3.70024e+06	2564674	3.02046e+06	2.98998e+06	3.52425e+06	3.22938e+06	3.32373e+06	2997318	6.60389e+06	3.74893e+06	3687370	4.26448e+06	4.49362e+06	3.73401e+06	3.65304e+06	2849625	3.81671e+06	3.07523e+06	4.78715e+06	4.31844e+06	3.75215e+06	4.09116e+06	2997912	6056577	4.31638e+06	3.03968e+06	2.80759e+06	4349410	3.34456e+06
P00688	Pancreatic alpha-amylase	3.7137e+06	5633655	5.14512e+06	3697311	5043230	5246001	3994316	6728510	9212640	6.9754e+06	5527354	7128628	11740916	12116138	9181442	3.23975e+06	5.23621e+06	5677163	3.64512e+06	5.41081e+06	6.2002e+06	4.77062e+06	7090223	8888634	5785348	5.41711e+06	6.90165e+06	10218880	11043460	9210227
Q61646	Haptoglobin	3688341	3.85053e+06	2939762	5573520	3.91561e+06	2.48205e+06	4.20106e+06	2.297e+06	5188306	18933248	10182537	13313687	306188	507410	1678942	3.49947e+06	4392336	3.22484e+06	4993761	5264647	2.8019e+06	6.96336e+06	2.55315e+06	6442750	18159894	11023387	12271445	295064	273160	1.91586e+06
O88188	Lymphocyte antigen 86	3.63796e+06	10065780	4590669	3.15446e+06	5.21773e+06	5.67418e+06	2198152	3.66122e+06	3214570	6.21456e+06	5239759	10639099	3.61869e+06	7940315	4722581	2.76027e+06	4.17585e+06	5301329	3.46244e+06	9567388	10900145	4595818	9317587	3760438	6048513	4874007	8982545	7298713	3935849	4600583
P11087	Collagen alpha-1(I) chain	3.29359e+06	4.12307e+06	3.48151e+06	5481206	6.50762e+06	4.21209e+06	1739546	3.3308e+06	1.36951e+06	2.62176e+06	2551748	2.23275e+06	3013063	3.82865e+06	1.55626e+06	3.12752e+06	9949208	1.59581e+06	4944673	14684289	3.38624e+06	1.70573e+06	3549216	1.31145e+06	2590490	3.58559e+06	2.49248e+06	2.99359e+06	1.13402e+06	3.18605e+06
P15379	CD44 antigen	3.28835e+06	3.9985e+06	4.13586e+06	3.90061e+06	5250167	3.52617e+06	3370006	4.0067e+06	2502445	3807493	2.51968e+06	3.47936e+06	3.18121e+06	4.11529e+06	3.75513e+06	3299099	5725456	3.51002e+06	3.73087e+06	5540168	3.1528e+06	3.11104e+06	3.34311e+06	3.08485e+06	2.4605e+06	3181442	3518637	2762934	3.42619e+06	3598556
Q9EP95	Resistin-like alpha	3099080	3.24228e+06	465059	1.40921e+06	11406448	1.30958e+06	467476	Filtered	Filtered	Filtered	1.02902e+06	Filtered	3203779	1.86871e+06	5488104	3.39895e+06	3.07663e+06	40736	1352316	9671727	725761	625684	Filtered	Filtered	607408	973711	Filtered	2.31965e+06	2410511	5306373
Q9Z0M9	Interleukin-18-binding protein	3073983	2.73286e+06	2.65919e+06	3.39986e+06	785331	2.9021e+06	1.18603e+06	2.13275e+06	2098911	1.80056e+06	3197764	2.83628e+06	2997510	4.33659e+06	2.6841e+06	1.28826e+06	3181968	2.99629e+06	2.8757e+06	1.39534e+06	1.98969e+06	1.45121e+06	1.74996e+06	2.54396e+06	1.79563e+06	2106669	2.82635e+06	2.42403e+06	5198907	5.7386e+06
P97426	Eosinophil cationic protein 1	3.06739e+06	3.65139e+06	2.73844e+06	2.47265e+06	6.84503e+06	2.61601e+06	1703635	2.40033e+06	3269233	2.71242e+06	2.555e+06	3319633	2.82295e+06	4.15544e+06	2.11651e+06	2.94651e+06	3.15452e+06	2290003	2538649	4683894	2863455	1.63521e+06	2.16567e+06	3.39902e+06	2.12204e+06	2.80788e+06	4537720	2.68124e+06	2.28586e+06	2.07315e+06
P01660	Ig kappa chain V-III region PC 3741/TEPC 111	2.99361e+06	514483	744313	1.2074e+06	1678033	641770	1.12076e+06	989683	391194	2.06096e+06	666275	666582	536017	460922	1.47439e+06	3.66455e+06	790857	763887	1.92985e+06	1.20912e+06	1.1679e+06	1.25952e+06	724104	304776	1344220	976682	Filtered	706949	1.42968e+06	1.49582e+06
O08997	Copper transport protein ATOX1	2.95083e+06	3.01218e+06	4.10221e+06	3233541	1643678	3925167	2.54409e+06	2.16442e+06	2613142	5347533	2682497	2899509	3.26069e+06	1.89945e+06	2.07421e+06	2.93821e+06	2927688	3881014	3.01648e+06	1.64323e+06	4.51042e+06	2.75105e+06	2387820	2105665	5.0097e+06	3141268	2.86973e+06	2.7664e+06	2.45226e+06	2.83584e+06
P10923	Osteopontin	2.93873e+06	5248018	1.69655e+06	2.31665e+06	8471642	6153307	1.54514e+06	347307	4165621	995902	4184665	3.74478e+06	5.37713e+06	4419719	7.67109e+06	3.49499e+06	5616128	1.86788e+06	2.46299e+06	8664854	6.92596e+06	1.7044e+06	477752	4.63049e+06	803835	5196148	3.81237e+06	5819597	3.69601e+06	6.78586e+06
P28798	Granulins	2.75807e+06	3.9223e+06	4.02867e+06	3.59089e+06	4225460	3.16604e+06	1.47854e+06	3.24471e+06	2.02464e+06	2.11484e+06	2.11732e+06	1.35342e+06	2.23369e+06	2.34425e+06	2.0747e+06	3.03932e+06	3.95577e+06	4.74648e+06	3.2176e+06	4768824	3.1868e+06	1.63774e+06	3240020	2350513	2.91553e+06	2.73236e+06	2052145	2.60042e+06	2161983	2.31777e+06
P01878	Ig alpha chain C region	2.66008e+06	2.69318e+06	1.10571e+06	1.9269e+06	2583773	956224	2301296	2.58391e+06	1.42279e+06	2.50623e+06	1.54062e+06	197438	431912	628503	550510	2.57994e+06	2979061	1.08376e+06	1.71006e+06	3451733	1.11371e+06	2.30804e+06	2.53435e+06	1.34115e+06	2224338	1.97115e+06	369282	826764	675216	479002
Q06890	Clusterin	2.50647e+06	5.11262e+06	4.3802e+06	4.09832e+06	5.22681e+06	5977203	1.90453e+06	4.3191e+06	4322856	3.64169e+06	3495296	6108215	7283661	5.4203e+06	4651469	3.25563e+06	5.20312e+06	4.22161e+06	4.31362e+06	5.99471e+06	6014543	2066240	4.59625e+06	4.46982e+06	3207640	4137827	5918549	9037378	4523018	3.81256e+06
P0CW02	Lymphocyte antigen 6C1	2.4797e+06	3.11795e+06	2.8301e+06	2.26073e+06	4928093	2.84667e+06	721148	1.27192e+06	1.72899e+06	2291126	2.38276e+06	2.61206e+06	3507585	2.95966e+06	3.8497e+06	2.31921e+06	2.59338e+06	2.58775e+06	2.10927e+06	5.3057e+06	2.41066e+06	848623	1.54843e+06	2358662	2.1492e+06	2.24425e+06	2233186	2.60022e+06	2704589	4198651
Q91X72	Hemopexin	2.17314e+06	1.3331e+06	1.72346e+06	1.85633e+06	510063	1.93284e+06	2375514	1.67745e+06	2.90667e+06	3120431	2.08584e+06	4321323	1168575	1.65779e+06	3.9399e+06	2638820	1.31911e+06	1.31049e+06	1.80159e+06	1.18568e+06	1.92383e+06	2.61535e+06	1.65163e+06	2977539	2.7333e+06	2.62778e+06	3.77168e+06	1.08351e+06	1.44133e+06	3.00522e+06
P01887	Beta-2-microglobulin	2.15768e+06	1.92347e+06	2.18378e+06	1.70655e+06	80271.6	2.06557e+06	1.44002e+06	1.05203e+06	883329	3.19474e+06	1.47605e+06	3.98504e+06	3.25714e+06	5725276	1487504	1910704	1.10727e+06	2.10817e+06	2273794	3349.74	1.77889e+06	1.43663e+06	1.4576e+06	955534	3.75859e+06	1.52603e+06	3066338	2.70625e+06	1.5855e+06	1.60809e+06
Q01339	Beta-2-glycoprotein 1	2127046	1.54952e+06	2.53783e+06	1517306	2.39693e+06	2.74381e+06	1.21957e+06	1.74808e+06	2.01797e+06	2.84802e+06	2.04637e+06	2458837	1962388	1.73954e+06	2.05788e+06	1.95539e+06	1.91018e+06	2.28148e+06	1464201	2334499	2574539	1.3354e+06	1.37165e+06	2252082	2.47022e+06	2.21189e+06	2250748	2.36037e+06	1.2375e+06	2070909
Q8BHC0	Lymphatic vessel endothelial hyaluronic acid receptor 1	2.06054e+06	2308430	2.81221e+06	2.22596e+06	4.70417e+06	2.71968e+06	1.92509e+06	2.0088e+06	2253281	4.09616e+06	2.53768e+06	2.48619e+06	3.0314e+06	2.82699e+06	1960852	2.10215e+06	4142391	2407000	2.67044e+06	3.31661e+06	4225215	2.14523e+06	1.60803e+06	2309516	2723543	2940740	2.53902e+06	4.94271e+06	2.98729e+06	2.81232e+06
P22599	Alpha-1-antitrypsin 1-2	2.02472e+06	2.29385e+06	1.23003e+06	1.42377e+06	1.77967e+06	2511560	1.77258e+06	1.87561e+06	2.74068e+06	2770046	2.88709e+06	5376205	4101731	1.6296e+06	3.05698e+06	1.58646e+06	1.73655e+06	1.38216e+06	1.55829e+06	2495511	2.24835e+06	1.72859e+06	2.09677e+06	2.94897e+06	3.01066e+06	3064765	3.82463e+06	3.21153e+06	2.60183e+06	3.67265e+06
P0CW03	Lymphocyte antigen 6C2	2.00289e+06	Filtered	2.63372e+06	2.60929e+06	3.91907e+06	2.58652e+06	807729	Filtered	1.88872e+06	2.73774e+06	1.33604e+06	3439396	2225126	2.86639e+06	4.10644e+06	2.13121e+06	3.03656e+06	1.72626e+06	2822620	4.16224e+06	2.71734e+06	931651	Filtered	4.55642e+06	1.82693e+06	3.44434e+06	3.50626e+06	Filtered	1.48339e+06	5.24899e+06
P01837	Ig kappa chain C region	1.9661e+06	1.54562e+06	1.0304e+06	1.64803e+06	1.44705e+06	2.88245e+06	1.17512e+06	2.16162e+06	1.34947e+06	1.67124e+06	2210028	2.09663e+06	1.18625e+06	1.45798e+06	2.73263e+06	1.20145e+06	2.39819e+06	1.12457e+06	1.19348e+06	1.76275e+06	3.05738e+06	1.64309e+06	2.09207e+06	1.84507e+06	1.26857e+06	2037698	2446466	1.34008e+06	1.47224e+06	2.69316e+06
Q9JI02	Secretoglobin family 2B member 20	1.72108e+06	4.52901e+06	7.884e+06	1.20104e+06	1.93248e+06	1.50638e+06	838042	13546566	10348450	17398306	10451852	49368424	16937396	5.5036e+06	561001	1612548	5.34181e+06	5.82266e+06	1.27807e+06	2.36528e+06	1.32618e+06	753231	14013953	14797250	14811470	9687666	44161916	14099737	4.07456e+06	584891
Q60648	Ganglioside GM2 activator	1.68453e+06	6.03757e+06	3.14276e+06	2.62624e+06	3.66581e+06	2.73121e+06	1.2247e+06	2.54057e+06	1.77908e+06	2359896	1.6752e+06	2.79279e+06	4924707	4.15747e+06	2.92848e+06	1.34949e+06	4.76152e+06	3.49809e+06	2.93133e+06	3.88297e+06	3160322	1.38579e+06	2.60375e+06	2326263	2.42232e+06	1.65455e+06	2.16553e+06	4023739	2.98662e+06	2895626
P04945	Ig kappa chain V-VI region NQ2-6.1	1.66459e+06	106315	Filtered	960742	Filtered	Filtered	1.06654e+06	522385	90681.6	992064	475186	125652	252369	1.23631e+06	652355	1.58223e+06	Filtered	101587	844038	215691	284079	833162	470268	297661	953159	565471	Filtered	392127	933523	501592
Q62395	Trefoil factor 3	1.66041e+06	8924999	9199578	3.6886e+06	4.96888e+06	8511948	2.48696e+06	8450790	4.37892e+06	6.78881e+06	8.13956e+06	14570007	4462839	11345203	6128046	3.17838e+06	20437326	2.99466e+06	10067709	11871775	14262960	5039249	18672324	9279460	7.29341e+06	4942555	12087860	9891156	12955079	15372932
B5X0G2	Major urinary protein 17	1.62877e+06	30829752	25786602	4649551	37724204	20967766	653208	7.16477e+06	47307352	16263195	24672198	12469292	65356160	18954352	20652440	1.53933e+06	25213610	22897736	2.44168e+06	28096764	33155834	872657	4304490	22365944	13233894	26404078	27758334	49927344	41834236	22459306
P01642	Ig kappa chain V-V region L7 (Fragment)	1.60722e+06	660242	Filtered	Filtered	Filtered	3.02255e+06	436534	415150	1.55928e+06	982564	1.11865e+06	Filtered	Filtered	138048	2886753	1.60323e+06	897241	1.31739e+06	935707	Filtered	2657663	671996	433389	1.68466e+06	864388	411019	1.16859e+06	1.18244e+06	2274590	3175816
P01864	Ig gamma-2A chain C region secreted form	1.58738e+06	1.843e+06	1.15387e+06	1124737	1.90949e+06	1.0453e+06	1.52612e+06	1.20279e+06	755926	2.40779e+06	1.23291e+06	925904	775135	3.1295e+06	4615192	1507301	2017565	986650	1.67664e+06	1.93997e+06	1.34359e+06	1.46212e+06	1.06247e+06	1.17045e+06	1.316e+06	866705	1.14805e+06	923189	2.32134e+06	2.64884e+06
Q00897	Alpha-1-antitrypsin 1-4	1.53672e+06	1.37193e+06	1.00468e+06	1.16467e+06	637378	2.0971e+06	1.71457e+06	1316449	982755	2207294	1.85637e+06	1.33865e+06	1.95463e+06	2227077	2.68898e+06	1.58234e+06	1.44169e+06	1.28937e+06	1275329	781580	1.42776e+06	1595682	795894	1.21053e+06	1.63748e+06	2.10269e+06	1537600	2118835	5675486	1.8688e+06
Q8K426	Resistin-like gamma	1512965	1.25829e+06	690319	1396471	1.33201e+06	1.41883e+06	1.72153e+06	1.21765e+06	2.07783e+06	451251	1.19804e+06	2.11247e+06	1.10482e+06	729821	1.24207e+06	1634008	1.06146e+06	1031925	1495532	1.62517e+06	1.27052e+06	1.77707e+06	1.42558e+06	2419325	421322	1.43211e+06	1.81546e+06	1.2159e+06	1.12035e+06	1.34666e+06
P13634	Carbonic anhydrase 1	1485776	503606	1.1594e+06	784983	390823	1.77905e+06	950372	1.48914e+06	770746	537591	770187	1.04056e+06	1.92771e+06	2450930	918240	1.47985e+06	528200	1.21062e+06	791066	524358	1.19392e+06	870945	1.50953e+06	1.26749e+06	419864	891246	1.09081e+06	1.70478e+06	2189807	937724
Q9JM99	Proteoglycan 4	1470856	391706	1.1093e+06	1.37758e+06	2.69553e+06	441680	537670	949181	1.59024e+06	863038	1.2073e+06	1.43104e+06	2571253	3.88486e+06	1.03752e+06	905536	2.28256e+06	408519	1.71269e+06	4323963	1.45182e+06	352759	1.0678e+06	570982	2.08954e+06	1379175	2.41777e+06	2.36943e+06	1.79469e+06	1.12661e+06
Q03404	Trefoil factor 2	1.46195e+06	2.60793e+06	1.36373e+06	1.81247e+06	5.42814e+06	2.26362e+06	1.44685e+06	2375098	1.68561e+06	1473152	1233584	1.64459e+06	1.71545e+06	4.3933e+06	2337313	2.02744e+06	4.50057e+06	1.18535e+06	2.18509e+06	5.18319e+06	2923974	1.77931e+06	2.65285e+06	1.81111e+06	997884	1.76569e+06	1.76501e+06	2.86514e+06	1.82841e+06	2877521
P11276	Fibronectin	1.44118e+06	1.03352e+06	1.79117e+06	795910	1.35482e+06	1.59594e+06	552635	606050	785074	2479313	1.75014e+06	822182	787519	1.56652e+06	1.19683e+06	1.10266e+06	1.71064e+06	1.34698e+06	1.44506e+06	2242908	1.84923e+06	626967	810236	1.23612e+06	1.69226e+06	1.71232e+06	696216	355156	367484	965203
P51910	Apolipoprotein D	1.43906e+06	1.98505e+06	1.64442e+06	1.44276e+06	1.62482e+06	1.03375e+06	1.38238e+06	2.01409e+06	1006344	3257158	2.4843e+06	1.5607e+06	2.10774e+06	2.12938e+06	1.18406e+06	1.19849e+06	2.30303e+06	1930615	1.60818e+06	1.91823e+06	1.19555e+06	1.34459e+06	1.82149e+06	1.21336e+06	2982584	1.94641e+06	1.40644e+06	1992256	2198355	1.23825e+06
P20918	Plasminogen	1405658	1.0263e+06	1.15191e+06	921041	984023	975570	1.05457e+06	724819	1.0914e+06	2.13598e+06	1336048	1.05259e+06	1.16688e+06	716466	595103	1.27385e+06	823435	1.24007e+06	1.15864e+06	1.29403e+06	1.03659e+06	973963	647378	1267077	1.72362e+06	1.49285e+06	1.43855e+06	1.26328e+06	658652	951338
Q9Z0J0	Epididymal secretory protein E1	1.40218e+06	1.82859e+06	1.65647e+06	1.64112e+06	1918354	1.8021e+06	956579	1724421	1.68033e+06	1.89815e+06	2.55429e+06	2.20057e+06	2.71291e+06	2.35419e+06	1.85273e+06	1.52664e+06	1.4284e+06	235104	1.02007e+06	3.32856e+06	1.70434e+06	771492	1.66295e+06	1.96632e+06	1.64487e+06	1.08803e+06	2.75655e+06	1.9938e+06	2189460	1.92014e+06
P05533	Lymphocyte antigen 6A-2/6E-1	1.35917e+06	4.63101e+06	3.57015e+06	1.31118e+06	7.19234e+06	4572111	2.72505e+06	2.84956e+06	2.07619e+06	5.87312e+06	1852752	4599404	3.89446e+06	5.08156e+06	4.44288e+06	1.4364e+06	4.76267e+06	2.00162e+06	2878611	5387546	3.08748e+06	1.38257e+06	2.34277e+06	1.76992e+06	3157959	3.31742e+06	3.51064e+06	5311233	155307	6.45508e+06
Q61581	Insulin-like growth factor-binding protein 7	1.27398e+06	1.47068e+06	1.48691e+06	1.38552e+06	2.0055e+06	1.96331e+06	969087	1686474	1.38813e+06	1304014	1329227	1.65687e+06	1.62672e+06	3.1377e+06	1.28261e+06	1.37727e+06	1439256	1.82154e+06	1611024	1.94346e+06	1.68505e+06	1.20873e+06	2.01883e+06	1434731	1.8986e+06	1556231	1.39447e+06	1.9897e+06	1.65361e+06	1429926
Q921I1	Serotransferrin	1.27153e+06	1313747	660812	790963	1.63862e+06	1.0988e+06	761369	961475	1.20453e+06	1.38204e+06	1.31638e+06	1.89937e+06	963680	1.45483e+06	1.55699e+06	1.40509e+06	1.37716e+06	577796	762153	1.55903e+06	916228	884270	994539	1.55821e+06	1091266	1.30792e+06	2.15598e+06	1014263	1.27713e+06	1.84829e+06
A2ARV4	Low-density lipoprotein receptor-related protein 2	1.2691e+06	2.59114e+06	1.78228e+06	1.31056e+06	2589565	2637197	719148	2.03504e+06	1.23625e+06	1.19521e+06	1.31239e+06	1.83801e+06	3.22979e+06	2.28257e+06	1.64011e+06	1.42745e+06	2.32314e+06	2364363	1.23715e+06	2.75871e+06	2.64866e+06	1.05356e+06	2286635	1.23672e+06	1.23015e+06	1.37925e+06	1.11525e+06	2.11608e+06	2.1083e+06	1.55832e+06
Q07797	Galectin-3-binding protein	1.26863e+06	1.54487e+06	1.74723e+06	1.51536e+06	2.20505e+06	1234141	847094	1.05061e+06	764691	1.0344e+06	431397	659181	836478	1.03624e+06	996691	1.21464e+06	1352291	1.50641e+06	1.53803e+06	1.87289e+06	1.94203e+06	822079	993239	860160	815694	633646	1.25161e+06	1.16967e+06	603915	1.01476e+06
P55292	Desmocollin-2	1.19655e+06	885893	884511	744105	568705	932975	740550	864093	796956	971947	901990	793298	782414	667527	843989	1.13796e+06	765850	700740	811933	1.06092e+06	971267	785979	983688	546501	901388	821350	745404	719670	645498	710141
P17047	Lysosome-associated membrane glycoprotein 2	1.18417e+06	2.05802e+06	3.56526e+06	2.26312e+06	2.55098e+06	1.46877e+06	1.11989e+06	1.79144e+06	1.27776e+06	1.31984e+06	1750693	1.98015e+06	2933168	1.60823e+06	1.63889e+06	1.48346e+06	3.30121e+06	2.35712e+06	1.37944e+06	2.50475e+06	2.05223e+06	1.22074e+06	1652501	2.43487e+06	1.35255e+06	1.30904e+06	1.91447e+06	2.06168e+06	2.0522e+06	1880155
P51437	Cathelicidin antimicrobial peptide	1.1836e+06	1.15747e+06	740702	992712	1.83303e+06	1.02266e+06	2482711	889317	4035757	1.10398e+06	1.60574e+06	2273128	1.1645e+06	623799	269502	1.04088e+06	1.61416e+06	826159	1.30088e+06	1.87726e+06	960121	2.59553e+06	917133	5.5277e+06	1.59382e+06	1.56027e+06	2.02155e+06	462051	665251	272201
P06869	Urokinase-type plasminogen activator	1.18353e+06	1.69438e+06	807661	988715	1.94034e+06	1.42573e+06	725191	1.31619e+06	1.09089e+06	971556	1.46219e+06	1.44034e+06	1.69966e+06	1.46481e+06	1.28245e+06	1.03818e+06	1821074	879832	916142	2.61223e+06	1.28065e+06	684658	1245285	1.26576e+06	966264	1526303	1.56468e+06	1640119	1.76036e+06	1.28412e+06
Q9DAU7	WAP four-disulfide core domain protein 2	1.11606e+06	1632171	1.05097e+06	1.14883e+06	1.75295e+06	1.03728e+06	1.07069e+06	1.0609e+06	957881	1.13418e+06	1.09658e+06	1.99382e+06	1.3122e+06	2601661	960917	1.03185e+06	1.33856e+06	1.22236e+06	1.20122e+06	1.61207e+06	1.06486e+06	1.1032e+06	1.39354e+06	948489	1.88356e+06	1.146e+06	1.35114e+06	1.19904e+06	1.19745e+06	537178
O70570	Polymeric immunoglobulin receptor	1.11162e+06	969949	718749	578921	694869	700839	795442	1.22156e+06	813227	945014	879604	742912	250279	723677	1.24612e+06	1044978	1.10477e+06	606059	708262	918243	707924	897182	1.12689e+06	759292	809009	812700	660749	308598	796432	1104447
P09036	Serine protease inhibitor Kazal-type 1	1.10505e+06	5.16176e+06	1.18046e+06	1.39121e+06	4.68556e+06	8813723	380393	4.3274e+06	4.12271e+06	5.0344e+06	3914131	5408475	6864506	4.67899e+06	4.6925e+06	4.11598e+06	5.9958e+06	1.90779e+06	1.55687e+06	4932473	2524108	1.33079e+06	4438089	3.48577e+06	1894470	2.04276e+06	13546047	5693620	1.49072e+06	4.161e+06
Q91VW3	SH3 domain-binding glutamic acid-rich-like protein 3	1.06126e+06	694167	837498	906925	637347	1.16115e+06	1.35337e+06	725700	1.70959e+06	1.86705e+06	1574220	910881	957290	1063753	925838	1.09807e+06	1136628	917113	862811	1.09208e+06	1.04263e+06	1.35702e+06	770467	1.74059e+06	1.62587e+06	1.41891e+06	880135	762198	521211	609499
Q9JHY3	WAP four-disulfide core domain protein 12	1.02762e+06	1.73931e+06	1.25665e+06	943834	2.66769e+06	1.64922e+06	554625	1.05264e+06	1.63534e+06	2.13596e+06	1.21158e+06	4647437	2.93093e+06	4.68026e+06	2.09416e+06	1.32617e+06	1.85144e+06	1.19817e+06	1.571e+06	2.03134e+06	3.30077e+06	985735	879957	2.70618e+06	1.76434e+06	1.4324e+06	3629282	2.90848e+06	2.0718e+06	2.00676e+06
O08677	Kininogen-1	1.00581e+06	1.45515e+06	1642904	1.55033e+06	1591662	1.56667e+06	715795	1.44874e+06	1.24634e+06	1.09097e+06	1301985	1.61882e+06	1.38834e+06	2.05114e+06	1.54447e+06	1.00285e+06	1.7347e+06	2.00703e+06	1.11445e+06	2.03765e+06	1692498	929052	1.74128e+06	1.69488e+06	989328	956780	1.45922e+06	1318733	1.77201e+06	1.1237e+06
P01898	H-2 class I histocompatibility antigen, Q10 alpha chain	981131	239867	613945	913267	155235	806063	940095	746717	674647	616263	543169	418091	413104	600108	543458	1055700	306397	567305	1.1033e+06	195405	817221	797832	846528	751619	683446	487678	387817	333039	1.88323e+06	625823
Q8R242	Di-N-acetylchitobiase	878462	1.92208e+06	1.9339e+06	1.6942e+06	2.12053e+06	2.00497e+06	487054	1.61334e+06	1.17806e+06	1261922	1.27449e+06	1.53977e+06	1930805	1.68773e+06	1.63468e+06	714643	2.79891e+06	1.79796e+06	1.55855e+06	3.58297e+06	2.08142e+06	529904	1.63897e+06	1.54892e+06	872314	1.02881e+06	1.5528e+06	1.86665e+06	1.59826e+06	1.66018e+06
P57096	Prostate stem cell antigen	838694	851467	700535	443596	1.35262e+06	597604	236043	753679	369568	459110	464039	980235	764433	1.2104e+06	604591	484560	1.20464e+06	587527	839280	1.18249e+06	729357	347346	798645	516882	784705	390935	999038	756469	808056	605308
Q8BND5	Sulfhydryl oxidase 1	827105	641590	903846	745541	571162	701014	806640	683695	694546	1.14582e+06	1.84425e+06	900122	806047	840296	685236	761077	629170	1.04194e+06	737346	606442	727199	617938	597405	791930	1.10065e+06	732472	1.02335e+06	885222	1.09261e+06	730872
P01665;P01666	Ig kappa chain V-III region PC 7043;Ig kappa chain V-III region PC 7183	805766	987906	703326	843646	1.84175e+06	1.92576e+06	702318	791393	477288	1.02587e+06	404678	698987	904871	1.17748e+06	828501	932863	855288	786444	724688	2.16756e+06	1.92612e+06	907280	1.62456e+06	1.24902e+06	880927	941924	1.75128e+06	646000	1242547	1.12772e+06
Q61398	Procollagen C-endopeptidase enhancer 1	804229	950537	650832	710206	1.20183e+06	553199	502558	1.1251e+06	708276	876948	1.26103e+06	1.07125e+06	1392061	974029	884618	726578	980636	643543	611922	1.34769e+06	816479	556008	1.22635e+06	459188	587238	1.09492e+06	1.42979e+06	1242807	812223	677874
G5E861	Sodium channel and clathrin linker 1	734164	4.54713e+06	2.0855e+06	1.46756e+06	2.24309e+06	1431566	300599	2.15435e+06	1.01417e+06	1.69457e+06	1.61624e+06	2.45546e+06	2.94032e+06	4885100	1.60186e+06	1.2784e+06	5.7974e+06	2.10055e+06	1.61323e+06	1.53853e+06	1.50005e+06	1.3104e+06	1.69987e+06	1.28733e+06	1.22605e+06	2.72965e+06	2.75241e+06	3503803	1461816	1.68674e+06
P60710;P63260	Actin, cytoplasmic 1;Actin, cytoplasmic 2	708911	365378	721529	271120	328385	494359	448616	319666	2.23908e+06	587654	356626	319789	613044	3.10068e+06	862747	539588	608645	789055	275092	464515	639539	407034	342616	2708808	423898	407306	643132	500176	978563	678674
O55186	CD59A glycoprotein	662015	783671	541015	271108	991950	582635	120795	597288	461134	200841	304422	713341	619444	1150639	670168	297634	677840	563422	354691	1.08608e+06	545817	183791	608631	515337	314357	521289	516217	1.31319e+06	358550	465691
P23953	Carboxylesterase 1C	650807	497633	292069	432970	493102	316877	449316	970583	412451	1.09353e+06	1.09087e+06	580437	515546	892208	487133	640582	532652	431336	417755	759768	318376	585894	1.01445e+06	440660	1.00891e+06	916662	551059	889838	585346	656166
P11588	Major urinary protein 1	606154	15056160	4.42474e+06	595969	15374400	11291829	286254	5390155	20462494	11285031	15050336	38595336	253388816	40437792	10726804	582237	14650987	3.57096e+06	667643	19972112	20634880	281872	5286105	25562644	7340772	22691932	45365928	231135840	20299458	9652936
P07361	Alpha-1-acid glycoprotein 2	583719	Filtered	151467	638082	219149	Filtered	1.33463e+06	208486	561835	2.72753e+06	2.50517e+06	2677686	Filtered	133491	457905	Filtered	Filtered	196258	705383	Filtered	123239	1.34885e+06	188284	881247	2.24244e+06	2.15828e+06	3.45252e+06	Filtered	Filtered	272920
P29699	Alpha-2-HS-glycoprotein	580316	312207	478900	346800	341305	960783	401794	308689	593114	723298	822382	1.45268e+06	274848	681883	546440	488675	533036	376654	465732	716894	620110	348994	398281	624158	634218	1.1169e+06	870524	686946	252351	291000
Q9D3H2	Odorant-binding protein 1a	542720	898190	1.22913e+06	781340	1.02488e+06	623933	640091	2762234	7466770	3428112	716806	2392998	1.15475e+06	1683531	708472	637667	1.35655e+06	1.29955e+06	1.0935e+06	866996	684846	789240	3.12677e+06	7478414	2.82691e+06	1.57946e+06	3.36673e+06	1.61982e+06	832150	652070
Q571E4	N-acetylgalactosamine-6-sulfatase	539920	1.75926e+06	1.68996e+06	971395	1.68554e+06	946188	539217	976878	888258	768266	548795	935672	1.55149e+06	1.46439e+06	1.14031e+06	505626	2269355	1.72468e+06	1388613	2.1193e+06	997202	501918	959022	1.14888e+06	695803	688030	1.17461e+06	1.55722e+06	1.55065e+06	1.27837e+06
P16382	Interleukin-4 receptor subunit alpha	510487	278909	310219	261408	195078	240654	364091	778358	362441	327269	258827	255359	Filtered	694009	Filtered	240511	Filtered	268205	327179	6830.6	208024	473522	299664	482968	740746	446541	Filtered	443716	452680	Filtered
Q9JHY4	WAP four-disulfide core domain protein 15B	480623	737181	177305	382043	926290	434380	206194	385885	294126	215227	340307	331387	545479	472158	449817	479025	999353	180670	298432	981585	501974	193994	234728	256463	168001	628540	381033	760226	595436	450441
Q9Z1R3	Apolipoprotein M	473452	Filtered	Filtered	275169	Filtered	Filtered	318830	Filtered	Filtered	199283	Filtered	346825	Filtered	Filtered	Filtered	472594	Filtered	Filtered	272826	Filtered	Filtered	205287	Filtered	687464	158345	Filtered	Filtered	Filtered	Filtered	Filtered
P02535	Keratin, type I cytoskeletal 10	469132	2.00776e+06	566204	345341	1504396	2.28058e+06	42650.5	363375	237823	314369	237797	1.61878e+06	2.53528e+06	1895898	364550	407721	1.58612e+06	684090	343734	1.29666e+06	2.12975e+06	167191	482573	332041	442723	334890	1.50027e+06	1.42637e+06	1.20092e+06	423383
Q9ET22	Dipeptidyl peptidase 2	467474	2.22068e+06	997780	829712	1425653	594453	513284	1.03482e+06	574070	853054	1.15202e+06	1.08779e+06	1.09456e+06	1.21599e+06	1350141	538629	2.17432e+06	1.53508e+06	856528	1.1249e+06	701116	594859	948861	924688	774669	1.04231e+06	1.06781e+06	1.14286e+06	6586393	1.3117e+06
P01633	Ig kappa chain V19-17	461872	265584	561387	562692	282927	238119	390407	63480.5	268176	121782	120131	350326	80535.5	455704	850217	654643	468067	230595	Filtered	374832	492926	598089	199281	435241	147255	152110	394869	91249.6	346423	945240
O09051	Guanylate cyclase activator 2B	461276	15951.1	Filtered	1	681680	256624	124840	Filtered	1	136794	175051	123935	409699	Filtered	239246	241937	328651	12828	96052.3	748498	122557	58098.2	Filtered	169179	163675	230436	138438	276207	Filtered	586949
Q9CQ60	6-phosphogluconolactonase	440620	160916	Filtered	912152	Filtered	442692	271709	Filtered	Filtered	110049	132641	554225	Filtered	635534	Filtered	379986	3.38115	1.27714e+06	903977	Filtered	2.23068	340139	Filtered	829611	737292	622306	Filtered	Filtered	605817	Filtered
Q9Z0K8	Pantetheinase	434575	1079552	484145	594495	707905	326389	750742	904097	500684	689854	377752	622723	736523	670693	638952	455743	943290	566834	640895	752638	463742	725623	920089	486238	751887	482437	288783	788263	1.44937e+06	545687
P07759	Serine protease inhibitor A3K	433716	841684	218786	305284	504337	336181	353983	1.816e+06	645741	1.08361e+06	1.57609e+06	1.18788e+06	688303	730907	766134	337968	1.03453e+06	273330	350497	836110	449441	345005	1.61394e+06	565212	904182	1.68809e+06	1.05843e+06	1.01307e+06	1.08594e+06	565601
P16675	Lysosomal protective protein	428009	1.0765e+06	1.30016e+06	1148968	1058752	994781	303823	583208	733110	715032	179555	748474	391296	1.0197e+06	758164	525385	1.09591e+06	1.41817e+06	773371	1.41842e+06	1.09065e+06	401041	771241	797662	894161	558729	617003	859919	875596	644066
P01843	Ig lambda-1 chain C region	427143	144090	294334	492191	509743	440260	374256	374085	195273	668726	380886	193261	205512	821166	587255	529236	224769	234623	440911	129631	350011	476757	336171	175839	560662	545424	81527.9	192880	358524	682153
Q91WR8	Glutathione peroxidase 6	425480	764657	483519	498123	1.25134e+06	486525	711741	858215	807290	551703	920449	853276	545075	72093.8	604408	321676	691510	608616	486097	1.35777e+06	966790	702308	809677	1.1241e+06	295181	812536	746828	855791	668120	625106
Q61271	Activin receptor type-1B	419434	647332	593055	356996	616403	986868	573314	712056	456515	581360	495105	436884	49790.6	758992	598380	474003	941702	399586	420250	862022	673743	280245	356307	420266	530241	711733	404146	360823	440106	630001
Q922U2	Keratin, type II cytoskeletal 5	419048	1.64053e+06	508958	603758	1.2694e+06	1.36711e+06	415500	230700	155075	335417	234472	794694	1.16847e+06	865716	878634	290956	3.98018e+06	813425	355343	2071419	959228	290489	889892	212599	468333	504785	3313258	1.03505e+06	4.00464e+06	878194
Q3UV17	Keratin, type II cytoskeletal 2 oral	417915	2.11102e+06	692884	144741	1.10303e+06	1.13031e+06	242928	377452	73244	313208	152359	Filtered	441600	Filtered	285770	383303	1.77357e+06	548190	254205	1.40093e+06	1761919	166513	444050	133408	165456	166561	1.53628e+06	305350	927222	330334
P70158	Acid sphingomyelinase-like phosphodiesterase 3a	409634	535667	194766	225108	1.32928e+06	636188	156806	224321	240887	316480	212232	740572	550128	999410	351183	150116	1.49073	515263	283967	2.47906e+06	307393	79195.4	65415.9	531306	172543	161929	9838.13	1.09933e+06	382394	592185
Q9WTR5	Cadherin-13	406988	358499	532461	508118	810895	575020	687235	538340	359776	320321	756464	713608	1155815	725031	547132	457857	405238	506921	528626	575165	708420	377560	295681	449438	511013	633870	654505	638982	1.08501e+06	795862
P07758;Q00896	Alpha-1-antitrypsin 1-1;Alpha-1-antitrypsin 1-3	398248	263860	211939	378943	31437.3	359830	284091	504963	304648	702809	642122	458820	535514	182242	469489	187262	326876	257996	473519	311895	451145	353244	480707	193778	604784	445937	800030	628674	467872	318619
Q61147	Ceruloplasmin	387221	127522	166287	243525	138079	28462.5	261045	311051	62539.2	428256	282912	299604	Filtered	282268	Filtered	318821	172440	80976.7	275158	81898	181468	281899	279147	287235	377344	282649	225409	Filtered	Filtered	288935
Q8BPB5	EGF-containing fibulin-like extracellular matrix protein 1	384939	423111	277394	290621	361372	318840	219831	259712	278780	355480	390620	265475	411872	456926	237282	357625	404224	165139	365275	585744	272660	256356	274409	265036	301288	312503	358737	359407	242532	217369
Q8BFR4	N-acetylglucosamine-6-sulfatase	379557	666144	509020	508968	454684	481361	292157	555931	367768	362909	434009	321047	591311	507074	323873	297066	327535	366466	425679	533187	400521	280206	299514	445412	254086	275776	424273	303319	435967	464970
P13597	Intercellular adhesion molecule 1	367446	23648.5	486947	482323	38981.3	462629	435931	155329	304286	525225	372597	621771	764655	385010	270420	456926	Filtered	411145	496192	23098.7	449716	508639	249272	358460	377351	371292	704445	203774	420634	161153
P35441	Thrombospondin-1	358409	356449	3.57417e+06	257699	261890	404718	168130	158161	Filtered	459443	334936	120050	Filtered	Filtered	6463.23	164086	Filtered	569051	Filtered	147671	112167	308359	172418	316308	814010	316972	Filtered	Filtered	Filtered	339963
P07309	Transthyretin	357002	422083	200559	319097	701734	375944	233791	977209	697959	329790	388430	208280	328902	214448	608013	308461	433336	259938	264850	952383	365455	304284	1.01326e+06	663615	275468	328044	352838	253771	382371	521534
O35664	Interferon alpha/beta receptor 2	340957	418155	142441	336745	662534	251513	274097	446928	306272	333209	192143	275156	170978	215279	375378	374001	527145	438761	413804	518591	278196	328425	488308	218587	396761	610884	224277	648425	393832	450018
Q9DBV4	Matrix remodeling-associated protein 8	336466	362643	1.00058e+06	809600	Filtered	371873	451107	501809	589802	758757	630456	867873	781595	488610	397040	279089	289459	511466	694061	303508	775649	458089	344880	850318	525254	424364	875659	587243	344884	458043
O88322	Nidogen-2	330745	Filtered	335865	638764	Filtered	191645	328411	296467	449725	482447	319249	547554	423352	431876	35188.4	177442	Filtered	532877	417603	Filtered	Filtered	302713	563820	337534	407029	510109	315497	433045	248037	384709
P46412	Glutathione peroxidase 3	329928	Filtered	374907	247887	398475	381449	284271	496666	427138	250253	197171	301301	Filtered	197481	129984	246042	320914	318514	235730	271029	Filtered	313248	192875	299294	173769	Filtered	279358	Filtered	147281	330047
P01868;P01869	Ig gamma-1 chain C region secreted form;Ig gamma-1 chain C region, membrane-bound form	312537	Filtered	Filtered	Filtered	Filtered	Filtered	171739	191112	Filtered	Filtered	Filtered	Filtered	11028.6	Filtered	Filtered	62718.4	235306	316853	253168	Filtered	376076	66927.2	2.11971	197034	113906	177910	73087.3	289456	31048.6	72996.3
Q9JLB4	Cubilin	312144	555877	548853	284204	380080	371520	191593	366850	164699	189536	229265	191834	370614	486202	350283	319073	625980	466306	344885	502366	427002	203146	464766	137059	182755	206917	251717	387386	345581	277616
P49935	Pro-cathepsin H	310663	351644	745363	383077	1.52904e+06	903990	152488	470461	552165	435371	509207	359591	1.92766e+06	744121	1.23434e+06	299426	Filtered	700409	428075	1.6094e+06	435898	144019	710958	847343	259431	370432	580099	1.60296e+06	777015	686344
P11859	Angiotensinogen	308404	Filtered	13343.7	155760	Filtered	464329	204400	74236.1	336603	345537	276609	755688	107113	389056	205309	180299	Filtered	263030	154183	128310	226695	109424	Filtered	105198	216601	210707	794922	Filtered	920515	Filtered
Q00898	Alpha-1-antitrypsin 1-5	305090	286930	111868	50724.9	Filtered	952540	618813	503045	405789	599554	706460	486856	483923	780507	882732	449934	Filtered	Filtered	359020	694696	259569	743701	127305	860413	241312	531310	1.08526e+06	1.13036e+06	542516	640643
P01592	Immunoglobulin J chain	303305	1.06565e+06	Filtered	615608	1.13632e+06	Filtered	344482	1.1047e+06	267281	1.16991e+06	678093	Filtered	Filtered	Filtered	Filtered	419941	1.2189e+06	Filtered	622399	1.60894e+06	66687.4	316289	1.07454e+06	693569	509763	385533	Filtered	Filtered	Filtered	Filtered
P41272	CD27 antigen	300462	12024.8	243902	222679	Filtered	158389	198399	Filtered	248540	440927	253946	Filtered	Filtered	Filtered	628879	289081	1.73835	106750	411809	645031	1.02656	178722	284351	Filtered	502606	257950	Filtered	Filtered	233656	524631
Q9ET66	Peptidase inhibitor 16	296861	382379	148237	274503	472189	310972	422012	194605	218270	448763	312588	150113	113984	607030	293923	268642	275883	100028	353798	284185	317533	364104	224052	232242	332909	173275	1.05393e+06	67435.5	907734	250568
P29533	Vascular cell adhesion protein 1	293861	133371	216412	302385	261605	293646	372455	397191	453281	389259	379360	255102	490299	929314	424112	356599	73689	308396	286054	222133	368070	405703	210407	278788	466372	290495	148872	476279	196825	159865
P06330	Ig heavy chain V region AC38 205.12	291012	Filtered	441849	265051	297771	248965	279907	319712	414619	515703	319252	176674	Filtered	266427	351234	357816	424817	193746	374651	211155	294818	293482	379935	281865	503496	290288	267169	162233	237576	265352
Q61847	Meprin A subunit beta	284677	203961	329026	234390	114466	300998	190700	363854	250811	246014	205072	295122	110115	485117	224776	355008	151754	421293	189169	257521	334329	267846	368590	260091	205671	129612	93869.7	147890	348089	167085
O09164	Extracellular superoxide dismutase [Cu-Zn]	283516	812807	589379	493656	938555	396216	207758	545986	376445	494848	586689	683809	770447	383744	417049	283446	840697	539109	498795	937655	667316	176932	703917	417528	757463	954652	466529	779165	507174	497907
P08905	Lysozyme C-2	279638	30725.5	82504.8	64744.2	Filtered	214736	119685	Filtered	198159	71468.1	70381.3	246771	185068	26943.4	105996	261185	39045.5	58754.9	59326.2	Filtered	320540	40360.6	102894	143764	88659.8	49366.6	500575	Filtered	166547	314078
O09133	Submaxillary gland androgen-regulated protein 2, isoform alpha	277131	Filtered	419642	397011	Filtered	Filtered	299376	300537	Filtered	631551	664966	348900	Filtered	Filtered	102476	259698	Filtered	661122	303328	Filtered	Filtered	265485	Filtered	226850	534962	786371	Filtered	Filtered	Filtered	Filtered
Q921W8	Secreted and transmembrane protein 1A	269437	301442	279578	225880	413231	261953	325973	245891	301398	251400	415219	246590	146657	195741	432758	284283	201880	417817	290627	372721	361001	287642	200168	206934	236849	294101	287972	139334	665774	425849
P21460	Cystatin-C	264478	578356	312653	205680	532694	348528	199256	367218	279832	346060	238751	418021	372187	1.1661e+06	314791	272348	306826	275905	263626	476733	302641	165394	483264	225213	344663	583382	300438	532617	574988	397792
Q60928	Gamma-glutamyltranspeptidase 1	261322	149016	210758	202640	Filtered	Filtered	184665	240286	Filtered	121831	501307	Filtered	663105	655086	51883.7	287313	448160	489137	73797.1	86187.8	252370	217131	298992	123223	Filtered	270403	225746	430752	332717	290960
P01662;P01663	Ig kappa chain V-III region ABPC 22/PC 9245;Ig kappa chain V-III region PC 4050	256554	Filtered	100782	176864	Filtered	Filtered	139746	135849	10844.9	205537	281740	Filtered	Filtered	Filtered	Filtered	214508	Filtered	138882	365624	Filtered	325320	151758	87852.1	Filtered	159602	344012	Filtered	Filtered	Filtered	85137.6
P10493	Nidogen-1	254694	233424	69916.7	327683	277121	112300	132460	147892	55208.2	131359	77077.3	190481	Filtered	Filtered	114731	192946	38920.9	126794	203916	19869.5	39989.4	142338	133841	58358.3	167433	152080	2.26384	113803	72756.9	70679.6
Q91V08	C-type lectin domain family 2 member D	246832	46392.7	363766	332182	Filtered	443458	100488	235038	231360	214671	261038	60687.5	322552	145899	201086	263591	130237	324900	286628	Filtered	280462	123107	460404	270668	333873	355127	118819	376735	239643	347978
P54818	Galactocerebrosidase	246141	593328	400878	297282	478067	96519	118996	532378	1	131777	194729	Filtered	540713	354130	375812	315154	872854	73735.6	269016	482808	270537	17540.3	272284	Filtered	174937	94327.3	Filtered	39642.7	565329	263887
P09470	Angiotensin-converting enzyme	244216	521533	467879	267855	457570	298709	142574	260067	146807	125275	304976	391431	407128	369791	172688	298899	373768	368240	146398	276881	244793	173425	299035	159579	68000.6	181460	150133	81815.1	324882	251533
Q05793	Basement membrane-specific heparan sulfate proteoglycan core protein	242724	747798	37882.7	51996.4	Filtered	429759	86531.8	Filtered	5673.36	584132	307290	Filtered	665948	741438	387112	13385.4	Filtered	211757	13089.8	570969	279154	52928.4	1	1	405097	242816	1	467692	421894	23677
O89020	Afamin	232957	483127	257357	282994	451607	274766	218722	456053	257146	346810	368125	273092	498941	311132	207553	221194	360434	344639	306776	341288	275666	157078	459330	231174	298841	408796	253104	456578	2.36771e+06	290485
P15501	Prostatic spermine-binding protein	231350	70152.7	Filtered	154429	189765	3275590	71557.2	Filtered	210839	Filtered	535710	7.84359e+06	580247	Filtered	Filtered	124629	74350.1	Filtered	36986.4	185928	4.19026e+06	Filtered	Filtered	239040	Filtered	486406	7.89184e+06	406984	Filtered	Filtered
P01635	Ig kappa chain V-V region K2 (Fragment)	224728	Filtered	Filtered	Filtered	Filtered	136114	46996.3	91273	110297	67577.8	210705	214619	2.38823	137609	156136	192801	Filtered	Filtered	Filtered	69961.9	128851	78285.4	133584	Filtered	64426.4	138933	105302	Filtered	96152.1	Filtered
Q9WUU7	Cathepsin Z	219996	850548	563655	464258	831005	426314	295136	515699	425438	548663	306023	496377	669324	555510	328108	380659	1.1261e+06	539334	679607	713479	448784	368305	458383	497020	463885	345744	452954	674872	669146	676244
P0DP26;P0DP27;P0DP28	Calmodulin-1;Calmodulin-2;Calmodulin-3	214905	Filtered	43358.7	61068.4	64663.7	Filtered	105071	63247	92132.6	37802.8	75382.6	162581	Filtered	Filtered	65605.3	238183	Filtered	52951.9	83015.5	125436	53196.9	149607	107283	252339	16223.3	42814.4	157359	Filtered	69988.2	Filtered
O35188	Fractalkine	213549	207609	375653	299137	Filtered	Filtered	175275	Filtered	Filtered	201900	167060	Filtered	Filtered	210772	Filtered	197506	324578	184341	231256	303425	166853	169017	Filtered	Filtered	163083	168092	123889	143996	29047.7	146991
Q61730	Interleukin-1 receptor accessory protein	213193	Filtered	122524	62980.5	105885	125098	82767.1	247629	197193	243705	200020	401094	Filtered	56880.4	Filtered	81952	Filtered	49309.1	94937.5	Filtered	Filtered	75423.2	144350	295545	197250	224734	277055	Filtered	199702	177612
Q02819	Nucleobindin-1	210942	324331	419476	311217	467952	253206	257281	270000	194246	506982	476184	429445	336838	391904	238493	198433	250439	526760	278351	445138	482048	278625	219684	209848	466302	262023	342543	387671	1.22861e+06	319737
Q6PDN3	Myosin light chain kinase, smooth muscle	208047	61578.8	129931	207219	Filtered	Filtered	166395	Filtered	359230	183399	198038	291336	Filtered	Filtered	Filtered	163132	Filtered	Filtered	234345	468247	361046	210905	305786	449545	154759	238117	Filtered	178317	318103	Filtered
P00687	Alpha-amylase 1	207737	Filtered	Filtered	110359	Filtered	Filtered	224722	176492	293279	86229.8	89299.4	203417	Filtered	Filtered	29702.8	236267	Filtered	Filtered	124696	Filtered	Filtered	257578	170408	293722	59549.5	48411.6	258277	Filtered	Filtered	Filtered
P18242	Cathepsin D	203042	766246	410011	472332	708044	814020	105419	207227	260049	215764	205747	689102	947000	443752	235788	238739	720862	477098	434534	1.34749e+06	450085	158082	280693	694131	155086	422863	314217	902001	1.30762e+06	412150
P13020	Gelsolin	202061	104539	139196	163380	88598.8	195388	194870	108208	258210	206418	141593	650766	349746	234799	225498	233184	78973	107171	185471	131052	237287	196834	86859.2	366485	102602	185419	329927	413260	223807	276563
O88968	Transcobalamin-2	199982	24179.5	313490	183572	Filtered	Filtered	92964.5	183891	164167	440765	224481	298061	315630	231193	211808	201278	Filtered	257179	199587	51272.5	125984	70605.4	182276	Filtered	358662	152791	352079	253500	187548	132166
Q61781	Keratin, type I cytoskeletal 14	198953	182765	145549	98233.7	149809	302727	20812.3	34981.3	51999.7	67957.1	83555.4	630566	110506	560401	146447	121818	213637	143149	58691.3	185048	394155	39981.4	90581.5	67961.6	52838.6	82345.6	262961	107781	147009	99498.8
P04940;P04941;P04942;P04943;P04944	Ig kappa chain V-VI region NQ2-17.4.1;Ig kappa chain V-VI region NQ2-48.2.2;Ig kappa chain V-VI region NQ5-61.1.2;Ig kappa chain V-VI region NQ6-8.3.1;Ig kappa chain V-VI region NQ5-78.2.6	198846	Filtered	Filtered	90159.3	78986.4	84233.6	136227	60785.6	Filtered	215247	Filtered	Filtered	Filtered	Filtered	Filtered	270949	Filtered	Filtered	125701	Filtered	Filtered	128229	Filtered	30146.2	194589	Filtered	Filtered	Filtered	34727.8	Filtered
Q6GU68	Immunoglobulin superfamily containing leucine-rich repeat protein	192078	668622	385326	347852	461476	329813	308932	230502	238528	189015	273784	215486	384569	802457	317006	208649	579847	325393	363627	Filtered	320016	221054	376214	249599	195844	381419	318727	264009	405176	182894
Q60847	Collagen alpha-1(XII) chain	191043	235528	189111	182631	635703	288188	167669	197090	201476	520828	300817	326673	348012	170821	145396	279136	290054	223348	203331	403501	183439	198034	174410	381106	377522	532111	207216	438376	Filtered	295106
Q9QXC1	Fetuin-B	186671	Filtered	209282	Filtered	Filtered	58477.8	137637	Filtered	81725.5	158656	106863	Filtered	Filtered	Filtered	Filtered	37718.6	Filtered	88632.4	Filtered	Filtered	Filtered	129945	Filtered	Filtered	102160	Filtered	Filtered	Filtered	Filtered	48749.2
O88792	Junctional adhesion molecule A	184487	190000	203378	258151	158772	311188	188768	238973	21818.2	227819	120553	Filtered	1.65878e+06	61755.9	57739.6	410949	Filtered	404950	1	225728	189958	226256	304259	209169	308660	177755	Filtered	541233	218024	130378
E5FYH1	Testis- and ovary-specific PAZ domain-containing protein 1	179507	Filtered	178508	52499.5	Filtered	Filtered	105191	Filtered	Filtered	212889	358681	650872	950895	758567	Filtered	190420	Filtered	Filtered	Filtered	Filtered	177226	229505	Filtered	Filtered	238628	400726	478527	708456	393701	182980
P01725	Ig lambda-1 chain V region S178	178690	Filtered	Filtered	139850	Filtered	Filtered	264673	Filtered	Filtered	87179.9	Filtered	Filtered	Filtered	Filtered	466558	Filtered	Filtered	Filtered	Filtered	Filtered	Filtered	164332	Filtered	Filtered	525905	Filtered	Filtered	Filtered	Filtered	Filtered
P04104	Keratin, type II cytoskeletal 1	178639	916980	310289	39837	1.80086e+06	724420	197284	394404	Filtered	31447.1	518556	1.14201e+06	1.66218e+06	1.00768e+06	184318	149537	1.01388e+06	361184	272687	979293	1.53508e+06	71436.5	139036	Filtered	187355	515658	1020914	836559	635463	383210
O54782	Epididymis-specific alpha-mannosidase	174491	373945	257062	267292	204142	Filtered	83341.4	142366	248089	627916	154554	Filtered	191092	42454.9	291564	176183	508381	158693	214020	312770	Filtered	64867.3	123349	225071	67023.2	Filtered	Filtered	294885	Filtered	264686
Q9JHJ8	ICOS ligand	168357	660074	323107	235637	448620	183997	257582	230555	203643	289904	221627	287487	322028	326414	600173	210016	701373	283091	178547	317444	251853	270573	346446	131606	326825	297692	455114	181069	2117889	280724
Q91XA9	Acidic mammalian chitinase	165671	36621.5	Filtered	71549.5	Filtered	Filtered	Filtered	233142	Filtered	47473.2	Filtered	Filtered	Filtered	Filtered	Filtered	158508	Filtered	Filtered	10531.8	Filtered	Filtered	44837.2	149678	94717.8	Filtered	Filtered	Filtered	Filtered	Filtered	Filtered
P18181	CD48 antigen	163732	272585	154348	138688	448518	106679	156150	241038	102852	222201	185651	185489	177661	175821	143436	132770	11194.1	155237	234700	306312	151014	137373	169803	36533	166129	158112	280937	157404	184076	213419
P05784	Keratin, type I cytoskeletal 18	156930	1.9202e+06	260766	224875	1682692	930527	75114.5	319822	28522.3	1	136167	1.76321e+06	340632	2.8358e+06	2171.48	128299	1.01237e+06	504968	328710	1.3668e+06	2.57053e+06	221085	Filtered	6966.63	321470	180112	1.04528e+06	184977	984695	56718.3
P20060	Beta-hexosaminidase subunit beta	154042	292997	195791	361484	298651	201116	120168	222965	175703	173706	150749	249214	316220	466087	84146.9	145452	285239	346965	368755	306696	257643	115468	366491	320423	84856.5	109995	1.21617e+06	225082	177169	239169
P12023	Amyloid beta A4 protein	152657	270243	262310	192975	313845	249019	86375.1	101515	123494	128630	136172	87463	169366	55203.1	232111	158711	372810	237193	149943	233954	377989	138033	352561	143895	154990	170455	215692	237552	152954	294267
P0CG49;P0CG50;P62983;P62984	Polyubiquitin-B;Polyubiquitin-C;Ubiquitin-40S ribosomal protein S27a;Ubiquitin-60S ribosomal protein L40	152536	584900	58003.7	113668	190195	130411	81389.9	142340	307898	255499	183642	281793	55578.1	267428	205143	86195.1	90387.4	80769.6	102143	87334.2	70667.3	90609.8	76566.5	169104	244837	174586	422024	242017	151112	116685
P11672	Neutrophil gelatinase-associated lipocalin	150124	Filtered	175122	213671	97883.8	319936	1435798	73765	1.4785e+06	401274	430308	190480	102989	Filtered	90072.6	244184	Filtered	194977	93310.5	128004	307042	1623423	Filtered	1655830	616926	446438	358210	Filtered	61982.3	443645
Q62266	Cornifin-A	149545	56071.4	130231	180795	128131	41389.5	21152.4	19622.7	60482.5	112904	27513	149593	59703.1	68869.7	37554.6	181152	41332.2	113918	123188	130964	127998	18978	38298.7	37357.5	56805.1	31086.3	273590	119540	69220.8	15939.7
O35448	Lysosomal thioesterase PPT2	144660	489192	464298	678386	260682	631281	202769	552354	472050	432646	344124	334949	650284	836656	499022	201223	637221	519932	403853	121672	332847	162515	426969	269149	204302	340839	286412	1119982	446950	274750
P01631	Ig kappa chain V-II region 26-10	143577	238739	87903.4	355982	Filtered	Filtered	152595	295426	Filtered	221632	387430	Filtered	Filtered	97352.2	130481	192931	Filtered	66068.8	70361.3	Filtered	Filtered	177956	105494	36751.3	233836	107647	Filtered	Filtered	Filtered	Filtered
Q61592	Growth arrest-specific protein 6	142694	166805	196835	148735	Filtered	212665	75773.1	114748	135060	111301	137514	202491	278336	174425	178928	124369	230589	160409	75237	106866	129852	78110.6	146568	171516	103141	153657	141641	212203	195673	124496
Q99P86	Resistin-like beta	133422	53695.1	Filtered	Filtered	277060	140434	22814.3	226733	25871.6	11095.3	212374	Filtered	Filtered	Filtered	88332.5	162013	Filtered	32243.7	Filtered	341536	186158	144647	168804	140910	48303.5	428664	Filtered	Filtered	278423	180592
Q8BM88	Cathepsin O	132182	Filtered	Filtered	163290	Filtered	Filtered	80077.6	6568.55	Filtered	81105.3	Filtered	64823.1	Filtered	Filtered	1.2211	31925.4	Filtered	1655	216704	67327.2	Filtered	57250.5	Filtered	50623.1	Filtered	1	Filtered	Filtered	Filtered	33012.8
P70665	Sialate O-acetylesterase	131681	465467	358529	146381	347583	176196	66183.3	134899	342444	172161	300942	Filtered	Filtered	Filtered	95007.5	118722	199049	200679	59338.9	484063	174604	42633.8	154829	Filtered	Filtered	Filtered	Filtered	Filtered	Filtered	161120
O55135	Eukaryotic translation initiation factor 6	127793	Filtered	287742	295646	Filtered	512269	152526	171232	386848	449357	212409	Filtered	Filtered	Filtered	Filtered	311011	Filtered	360038	199447	Filtered	274570	103667	180110	277220	Filtered	149683	Filtered	Filtered	112093	153033
C0HKG5;C0HKG6	Ribonuclease T2-A;Ribonuclease T2-B	127446	158415	111121	86625.7	228695	56441.8	69555.6	122821	76031.7	116892	73188.3	135402	108002	212349	83172.8	120563	193006	107888	100080	84813.3	105248	103756	110003	28184.5	91564.2	104956	112646	121570	178814	133778
Q8BK62	Olfactomedin-like protein 3	126563	Filtered	132849	70195.8	Filtered	20524.4	58628.1	189413	43760.1	265761	Filtered	Filtered	Filtered	Filtered	34712.7	121409	Filtered	185022	93051	Filtered	Filtered	37158.5	Filtered	13799.7	212196	35949.1	Filtered	Filtered	76454.2	Filtered
Q4KML4	Costars family protein ABRACL	126548	Filtered	218764	113007	Filtered	368568	173826	56411.2	671745	575202	Filtered	262870	163490	45178.8	249010	180962	Filtered	198785	145745	Filtered	414329	281051	42104.4	704075	400929	264292	608418	132893	Filtered	263682
P10605	Cathepsin B	124499	191367	168870	239634	196403	174076	131681	153445	142350	179185	100105	341081	243692	468469	180348	128920	223482	221802	283916	196579	192663	150287	154132	141585	179406	151176	142158	241827	205495	165786
Q5SSE9	ATP-binding cassette sub-family A member 13	123255	303303	103929	126990	172078	282484	63241.6	193123	84817	89646	76118.7	532349	511998	243455	239969	97831.2	285797	255903	132910	192346	385641	94834.4	125384	131946	61704.2	107813	150994	264624	121841	125273
Q9QWR8	Alpha-N-acetylgalactosaminidase	122123	332071	195629	108528	141356	103914	76599.3	117888	175664	248347	115252	156180	401775	Filtered	258705	120796	237727	127117	172209	166312	108284	87997.4	265548	162558	228916	130802	150268	Filtered	223995	196195
P70699	Lysosomal alpha-glucosidase	120444	394262	112950	229199	234635	85256.5	73319.3	185014	183245	242793	143474	8424.04	185908	513151	122962	121185	437757	123932	267005	299647	237697	119125	236477	167789	166668	192816	127719	340244	192587	112464
O09159	Lysosomal alpha-mannosidase	119597	220454	179146	120610	Filtered	Filtered	77500.5	133022	72819.9	51491.9	29567.1	Filtered	Filtered	44194.6	117089	126907	131172	165524	167806	297490	95425.6	51069	30945.1	91354.7	33698.8	61657.9	33956.7	Filtered	384945	126423
P11591	Major urinary protein 5	117184	89681.3	187137	233549	3.34697e+06	190357	67714	93409.8	163158	83302.5	87454.5	125446	148297	3096967	Filtered	112129	51043.5	146781	294960	41889.7	116754	73092.6	93758.2	224159	104547	93787.1	45746.8	120594	Filtered	38848.7
Q9WV54	Acid ceramidase	116465	382180	294072	285822	441761	266895	58370.8	171909	140694	Filtered	152964	63544.5	169863	215117	398774	187012	602864	411718	222355	624559	201948	69645.8	203161	284833	63958.6	242786	49684.8	251422	448965	305145
O35206	Collagen alpha-1(XV) chain	115320	Filtered	Filtered	99183	Filtered	Filtered	109717	Filtered	Filtered	896201	265811	Filtered	Filtered	Filtered	Filtered	86235.8	Filtered	140975	169303	Filtered	144335	128474	108062	Filtered	281875	242009	Filtered	68453.2	Filtered	Filtered
Q61129	Complement factor I	114855	Filtered	Filtered	65539.1	Filtered	223623	26219.1	43557.4	Filtered	170608	98683.1	56055.8	38480.2	Filtered	107921	206486	Filtered	145692	Filtered	164751	131817	34967.5	76724	59106.3	115310	Filtered	Filtered	Filtered	Filtered	97979.3
P23780	Beta-galactosidase	113827	Filtered	259937	165376	60929.2	174059	62777.5	10483.8	77994.7	109587	74543.5	171449	375273	165608	162737	53699.2	Filtered	314656	140909	Filtered	183357	45403.6	51439.2	90010.4	125583	10824.3	Filtered	273667	162078	148072
Q7TMR0	Lysosomal Pro-X carboxypeptidase	112525	290200	291737	178924	321778	276923	98345.7	180598	145087	303641	165441	120220	335062	254116	308376	65071.7	66576.3	282517	160977	196864	191271	104987	314082	142022	96505.6	109289	219553	335619	401651	381622
Q3TTY5	Keratin, type II cytoskeletal 2 epidermal	109214	443099	568004	173255	982493	721937	54640.1	183770	Filtered	49400.5	35925.6	518851	236710	464360	54872.6	227294	412988	619582	141479	521700	684922	60560.7	155809	94165.1	Filtered	83054.9	539969	376063	324421	142909
Q8VED5	Keratin, type II cytoskeletal 79	108910	657412	192406	55064.6	194061	501798	60046.5	91262.8	6065.91	173016	Filtered	159412	98373.3	470871	Filtered	87140.4	492540	171096	86773.6	321133	453029	48818.6	98108.4	10455.2	107426	40805.8	280754	95683.3	629666	Filtered
Q7TMJ8	Phosphoinositide-3-kinase-interacting protein 1	108134	Filtered	132124	198109	144295	237004	67721.6	155756	348872	Filtered	188613	247999	189048	Filtered	388138	Filtered	299842	162016	201599	312957	242460	197555	303096	284648	Filtered	150844	196422	Filtered	186952	184512
Q64729	TGF-beta receptor type-1	108100	Filtered	84748.1	61187.3	40403.6	129373	84095.4	94515.9	37114.3	126178	Filtered	Filtered	Filtered	Filtered	46578.7	78754	57592.8	63471.1	122058	91015.4	70900.5	79785.9	Filtered	Filtered	39960	53157	40553.6	Filtered	77911.3	Filtered
P04441	H-2 class II histocompatibility antigen gamma chain	107442	Filtered	Filtered	85747.9	Filtered	Filtered	18291.9	1	Filtered	90528.4	Filtered	Filtered	Filtered	Filtered	Filtered	Filtered	36739.4	91155.2	Filtered	Filtered	Filtered	2809.04	Filtered	Filtered	Filtered	Filtered	Filtered	Filtered	Filtered	Filtered
P06797	Cathepsin L1	106514	Filtered	90434.9	82315.2	Filtered	Filtered	67978.8	168068	111639	139667	149898	Filtered	Filtered	Filtered	Filtered	48829.4	Filtered	47769	56240.5	Filtered	143024	76863.5	160601	143263	133527	117851	Filtered	Filtered	Filtered	Filtered
A2AEP0	Odorant-binding protein 1b	105667	685.334	273116	233383	15059.3	17103.3	100762	1.39084e+06	179459	233988	180973	577020	853258	Filtered	14316.5	125385	Filtered	162127	244469	5981.39	117925	160194	1292803	115145	326719	155920	989838	465303	Filtered	98252.7
Q8VHF2	Cadherin-related family member 5	102485	Filtered	118486	131644	Filtered	54503.4	110215	150027	333918	Filtered	Filtered	402322	73226.3	Filtered	Filtered	57002.4	Filtered	11610.2	Filtered	Filtered	209621	Filtered	Filtered	106538	Filtered	Filtered	Filtered	7527.61	Filtered	Filtered
Q9R098	Hepatocyte growth factor activator	102428	139281	134488	132056	161380	35172.3	129008	125912	89286	157390	123000	133994	54884.9	122158	38537.3	135117	54156.9	127227	145981	270258	75580.8	118956	154607	127518	124978	158519	115209	51959.2	20160.2	127261
Q8K2I4	Beta-mannosidase	101379	148692	103830	117274	1	42391.4	169648	61170.8	95947.5	124368	60372.7	Filtered	169112	Filtered	103224	73089.9	93316.1	193716	282716	127354	212658	87710.3	144692	141386	107187	131433	Filtered	1	1.4676	82584.1
P31725	Protein S100-A9	100596	Filtered	146083	81241.5	Filtered	158347	66563.3	278089	301959	58289.2	121057	119522	70943.8	34427.9	129136	133334	Filtered	154228	76820.2	Filtered	241613	157366	229301	242902	70863.4	171121	182516	112694	54771.9	156714
O35657	Sialidase-1	100154	173605	256336	158896	133102	Filtered	36657.2	67249.5	128821	209986	75441.9	Filtered	64194.4	Filtered	148472	82181.3	Filtered	198890	175674	180104	Filtered	67063.3	80490	154324	119665	84132.6	140555	88092	103920	92683.4
Q8K182	Complement component C8 alpha chain	99510.5	83141.1	114383	68028	86982.9	88914.9	Filtered	54290.5	60898.7	161313	142258	97122	105852	Filtered	67458.1	85934.8	90037.5	102780	63147.8	87153.5	92902.1	11617.8	86479.1	89792.3	129524	139176	97814.5	88830.5	43760.6	104326
Q9CZT5	Vasorin	95778.7	172902	273399	140887	215540	166589	180219	155111	59268	237895	215243	142707	Filtered	341536	154492	220951	125499	106502	145883	79914.2	138329	81106.1	105784	102605	98959.2	252926	222657	316963	47437.8	135957
P03976	Ig kappa chain V-II region 17S29.1	94818.7	Filtered	Filtered	215889	Filtered	Filtered	154408	Filtered	Filtered	238712	Filtered	Filtered	Filtered	96822.2	Filtered	58978.2	Filtered	Filtered	71181	Filtered	Filtered	217393	Filtered	Filtered	93134.7	Filtered	Filtered	Filtered	Filtered	Filtered
P25119	Tumor necrosis factor receptor superfamily member 1B	94467.8	51274.9	98974.5	140235	Filtered	185877	145861	4677.94	171383	39004.9	51377.5	274424	25457.9	Filtered	126619	115834	57680.8	109033	178203	97178.6	101600	232929	105642	213651	83994.5	Filtered	47353.9	Filtered	31568.8	117875
P35456	Urokinase plasminogen activator surface receptor	93928	32212.3	88345.6	95833	Filtered	99461.6	73606.9	34898	148883	148935	99719	60739.3	Filtered	Filtered	Filtered	105754	Filtered	70419.6	114340	Filtered	71047.1	102580	59060.6	215099	146681	110083	89107.3	Filtered	Filtered	Filtered
P21956	Lactadherin	89847.8	104295	193142	112272	239901	155285	63050.4	153205	101344	86273.6	70250.9	Filtered	73848.3	Filtered	105170	120227	272753	153377	170635	330590	262322	104100	90903.7	123839	155091	122896	176878	199500	136477	146546
P55288	Cadherin-11	88080.8	177881	162824	134095	22302.7	172788	162695	121656	142568	74680.6	188510	109496	189055	Filtered	76629.4	105393	258752	145222	117487	175994	199463	255818	143700	249387	160740	317246	169730	267684	118136	101287
P97449	Aminopeptidase N	87610.8	111560	79246	111899	124220	39562.1	78378.4	220153	330200	187921	117297	42119.9	98374.7	998172	93494.1	92832.8	72593.1	59230.3	88159.7	168540	78279.9	58055.7	198950	101661	92048.5	113310	145194	189723	116162	77573.1
O08692	Neutrophilic granule protein	86628.7	Filtered	Filtered	Filtered	Filtered	Filtered	146624	Filtered	Filtered	Filtered	Filtered	Filtered	Filtered	Filtered	Filtered	192348	Filtered	Filtered	Filtered	Filtered	Filtered	200276	Filtered	Filtered	51613.9	Filtered	Filtered	Filtered	Filtered	Filtered
Q920A5	Retinoid-inducible serine carboxypeptidase	85734.1	181480	195223	93814.8	29362.5	66206.9	115928	66305.6	6668.32	167131	113025	144292	286160	425391	226395	32480.1	19811	109894	239641	136392	78325.4	60182.9	79123.6	57881.7	123386	106323	Filtered	Filtered	29961.8	196088
P97816	Protein S100-G	84499.6	119395	78130.3	48838.2	146440	73175.1	91624.1	87718.4	76438	47317	69932.1	89757.6	121314	49499.7	143407	62698.1	94328.6	26216	79969.5	116614	60427.7	84868.8	98195	84621.9	19552.5	88111.4	69386.4	172081	159248	132301
Q6SJQ5	CMRF35-like molecule 3	81471.7	Filtered	284335	120628	209175	171147	81235.5	63033.4	83814.6	153496	44320.7	Filtered	Filtered	Filtered	79480	86168.1	100850	357219	1	129654	133031	95582.6	197003	114223	120542	91839	62032.7	124434	71008.3	Filtered
Q925F2	Endothelial cell-selective adhesion molecule	80599.5	182880	153248	143337	150201	88435.7	56679.7	131200	94321.5	129338	164755	Filtered	187528	Filtered	105088	93802	144130	125778	161529	131503	Filtered	70228.9	113757	98979.8	46299.6	Filtered	99540.6	Filtered	109272	Filtered
Q9DAK9	14 kDa phosphohistidine phosphatase	79658.9	125276	70651.2	40081.1	301786	122125	85002.7	27620.8	52220.5	73275.8	106835	91941.6	Filtered	Filtered	144695	89814	Filtered	62550.5	78177.4	172740	162225	138849	Filtered	86212.1	123286	154861	80516	46048.5	57378.2	148659
P99029	Peroxiredoxin-5, mitochondrial	77923.1	Filtered	57749.1	51395.2	Filtered	45202.3	72251.5	Filtered	630226	Filtered	Filtered	Filtered	Filtered	Filtered	Filtered	Filtered	Filtered	123255	Filtered	Filtered	110198	91716.2	Filtered	722407	36403.7	Filtered	Filtered	Filtered	Filtered	182831
P01654;P01656	Ig kappa chain V-III region PC 2880/PC 1229;Ig kappa chain V-III region MOPC 70	77486	Filtered	Filtered	Filtered	Filtered	Filtered	70154.5	Filtered	Filtered	112206	Filtered	Filtered	Filtered	21718.8	Filtered	Filtered	Filtered	Filtered	32316.5	Filtered	Filtered	14680	Filtered	Filtered	50943.3	Filtered	Filtered	Filtered	Filtered	128124
P07146	Anionic trypsin-2	75433.1	Filtered	Filtered	Filtered	Filtered	Filtered	1.1504e+06	4.34479e+06	2.25498e+06	1	30587.7	Filtered	Filtered	Filtered	Filtered	Filtered	Filtered	Filtered	Filtered	Filtered	Filtered	1.53809e+06	5398830	3.13772e+06	156236	Filtered	Filtered	Filtered	1	Filtered
Q9R1E6	Ectonucleotide pyrophosphatase/phosphodiesterase family member 2	74532.2	150422	92218.8	77079.2	50936	116067	53150.8	183803	155837	88509.5	128876	117064	125467	42306.5	89619.6	77181.4	270017	129554	80149.8	85972.7	145098	82948	247877	184774	56312.5	246532	177762	152113	101191	73683.8
P11590	Major urinary protein 4	72160.1	Filtered	68089	52110.6	108312	130002	91030.5	197031	200174	128052	135578	194514	264399	538319	42390.5	30220.9	Filtered	91395.2	82972	526247	83619.5	32708.6	243592	225882	129236	124191	62863.7	194078	Filtered	55622.6
P63101	14-3-3 protein zeta/delta	71896.9	Filtered	59916.2	36943.7	Filtered	52288.7	62660.8	44280.9	168862	90579.6	40094.8	57588.7	Filtered	59815.1	Filtered	52706.9	Filtered	153274	47282.7	Filtered	Filtered	55306.3	17986.6	194397	86125.7	69762.2	89743.6	Filtered	20087.8	41767.7
P97300	Neuroplastin	66791.4	125649	91523.5	130395	2426.12	114665	97570.4	166480	131967	86368.9	4668.55	96790	24925.9	225354	114203	94079.8	252788	92344.6	163741	127789	200908	127967	207991	184549	73222.1	91061.5	385280	114290	36654.6	Filtered
Q61826	Mucosal addressin cell adhesion molecule 1	66462.7	Filtered	Filtered	94046.9	82454.1	Filtered	57351.8	80217.7	28257.3	47731.9	Filtered	Filtered	Filtered	Filtered	65107	60135.4	Filtered	96999.7	91406.6	Filtered	Filtered	40834.7	67927.1	54957	43051.9	101064	Filtered	Filtered	Filtered	74330.6
Q8K3J9	G-protein coupled receptor family C group 5 member C	65944.1	Filtered	76383.1	Filtered	Filtered	Filtered	36024.2	115821	43685.4	57751.3	49600.2	Filtered	124019	Filtered	Filtered	73249.2	Filtered	118687	15800.1	Filtered	60110	46159.9	62087.1	73412.4	Filtered	137957	Filtered	Filtered	166052	Filtered
Q80X71	Transmembrane protein 106B	63746	328177	280556	295100	256236	408018	147471	436340	345505	163910	131778	Filtered	215608	Filtered	215885	380632	Filtered	136570	361964	349594	65575.5	275404	216390	262195	Filtered	Filtered	Filtered	Filtered	163083	Filtered
P18528	Ig heavy chain V region 6.96	63595.8	Filtered	Filtered	Filtered	Filtered	Filtered	36500.7	61572.1	Filtered	Filtered	Filtered	Filtered	Filtered	Filtered	67442.7	71305	Filtered	Filtered	14632	Filtered	Filtered	42615.6	Filtered	Filtered	90722.3	Filtered	Filtered	Filtered	Filtered	221527
O35305	Tumor necrosis factor receptor superfamily member 11A	63089.8	Filtered	193802	109877	197264	Filtered	53477.9	139088	77614.2	90633.3	199437	Filtered	Filtered	Filtered	77321.1	22376.3	51516.3	Filtered	Filtered	71720	Filtered	28062.2	77866.8	74075.2	Filtered	45102.9	Filtered	19076.2	Filtered	63694.9
Q61838	Pregnancy zone protein	62879.2	254604	734101	8007118	116154	638783	65174.6	155505	503409	4478254	9583426	436547	1.36857e+06	475686	682049	24152.5	282328	467570	1.89246e+06	29303878	722343	6595.95	77268.9	432144	36212.2	363567	459697	950107	212143	665860
P16627;P17879;Q61696	Heat shock 70 kDa protein 1-like;Heat shock 70 kDa protein 1B;Heat shock 70 kDa protein 1A	60851	410608	113984	49189.2	Filtered	Filtered	Filtered	Filtered	287107	242697	57445.1	70469.2	78519.8	Filtered	Filtered	103506	417712	Filtered	Filtered	Filtered	Filtered	57757.3	Filtered	228927	185989	93585.7	149914	55337.2	Filtered	Filtered
Q9D3L0	Membrane protein FAM174A	60659.8	110293	61813.8	52562.6	97594.4	Filtered	Filtered	49775.8	24251.2	86183.6	55087.1	Filtered	32284.4	Filtered	Filtered	74014.2	90976.4	73384.3	43763.7	109051	Filtered	27503.6	Filtered	Filtered	93652.7	38557.7	Filtered	Filtered	74241.6	57489.4
P21614	Vitamin D-binding protein	60187.7	91785.2	101924	113579	145415	63888.1	59880.9	46225.3	77491.5	95598.7	96013.1	Filtered	99551.6	Filtered	192518	37417	45787.7	58438.2	73398.3	147748	72595.3	59954.3	92360.2	98241.9	75480.9	68870	102408	160764	88930	168523
O89051	Integral membrane protein 2B	57534.8	Filtered	132532	1.02865	Filtered	Filtered	Filtered	16864.5	1.57053	1.14534	Filtered	2.75396	2.65039	Filtered	Filtered	61212	Filtered	206252	40837.9	Filtered	Filtered	Filtered	1.3054	Filtered	Filtered	1.72346	Filtered	Filtered	49866.6	Filtered
Q8R143	Pituitary tumor-transforming gene 1 protein-interacting protein	54877.9	375548	304229	164455	951379	1.05999e+06	156272	660732	45087.2	Filtered	723632	Filtered	1.73117e+06	Filtered	492287	17475.3	191517	84808.7	102368	106713	547577	267685	Filtered	55325.4	875809	Filtered	Filtered	944634	438839	373404
Q7M742	Secretoglobin family 1C member 1	48591.9	Filtered	Filtered	51070.9	Filtered	Filtered	60147.8	113357	Filtered	157822	65215.9	Filtered	Filtered	Filtered	Filtered	78567.2	Filtered	Filtered	73348.5	Filtered	Filtered	37985.7	83954.8	Filtered	100080	Filtered	Filtered	Filtered	Filtered	Filtered
P10126;P62631	Elongation factor 1-alpha 1;Elongation factor 1-alpha 2	48296.9	28202.6	Filtered	Filtered	Filtered	Filtered	14887.5	Filtered	272809	Filtered	Filtered	Filtered	Filtered	Filtered	Filtered	45041	67816.5	Filtered	Filtered	Filtered	3.25217	28000.4	Filtered	570471	Filtered	1	Filtered	Filtered	104145	100492
P15116	Cadherin-2	44230.7	Filtered	Filtered	26031.6	Filtered	Filtered	36184.9	Filtered	26094.9	1	84766.8	Filtered	Filtered	Filtered	Filtered	86846.8	Filtered	86159.9	54410.8	Filtered	49982.9	41947.7	94603.4	Filtered	Filtered	Filtered	Filtered	1	27567.7	Filtered
Q01279	Epidermal growth factor receptor	43894.6	7997.07	19619.3	40089.8	22482.9	12345.3	35985	86744.6	24003.8	62572.1	38249.6	84396.3	38833.9	86854.9	35405.1	47654.8	14194.6	39627.4	47580.1	14002.1	46872	45923.4	59763.1	22022.4	63642.9	88785.5	48683.6	31608.5	10224.1	36388.2
Q9DC11	Plexin domain-containing protein 2	42982.9	13320.5	Filtered	Filtered	87148.8	Filtered	Filtered	68463.9	20900.4	66219.6	64489.4	Filtered	85296.3	Filtered	Filtered	47592.6	36366.3	39208.1	Filtered	Filtered	43199.8	Filtered	Filtered	Filtered	22441.9	65023.5	Filtered	Filtered	21752.3	Filtered
Q00623	Apolipoprotein A-I	37606.3	Filtered	36803.6	21322.2	26403.7	Filtered	Filtered	Filtered	23846.7	Filtered	22818.4	45019.3	62533.8	Filtered	64226.7	31617.6	Filtered	Filtered	15684.9	Filtered	Filtered	Filtered	Filtered	18824.2	11661.8	Filtered	32409.4	71445.2	27739.5	72436.1
Q60932	Voltage-dependent anion-selective channel protein 1	36026	773696	260372	141614	1.22957e+06	616786	41614.1	127851	194722	95201	104968	Filtered	1.07543e+06	895240	400427	45807	1.15512e+06	110712	242754	1.06982e+06	590046	96955.1	246512	187366	Filtered	Filtered	Filtered	766970	218155	392063
P50429	Arylsulfatase B	35570.3	149180	122859	72519.1	130695	70566.6	10135.1	74091.2	73211.2	13409.3	55914.2	42962.3	120482	Filtered	8603.36	37254	3936.99	180175	84394.8	116508	100332	25016.9	86156.1	89145.9	3025.4	1341.02	Filtered	100740	63234.7	97778.2
Q62356	Follistatin-related protein 1	33383.4	52256.5	9122.57	66448.8	Filtered	Filtered	35471.7	67731.4	21679.9	35597.1	Filtered	Filtered	Filtered	Filtered	Filtered	52252.1	Filtered	25844.1	Filtered	Filtered	Filtered	43251.6	54544.7	Filtered	53354.9	Filtered	Filtered	Filtered	10684.7	Filtered
Q8BZT5	Leucine-rich repeat-containing protein 19	28651.6	Filtered	119293	51147	Filtered	Filtered	97241	107799	61652.9	78371.9	39227.3	59650.7	Filtered	81198.3	Filtered	31825.7	Filtered	120393	Filtered	Filtered	Filtered	75240.3	Filtered	157348	104113	69127.7	29180.5	Filtered	191993	123355
Q9DBX3	Sushi domain-containing protein 2	27566.6	Filtered	106710	Filtered	Filtered	Filtered	Filtered	24104.9	1	43815.3	10614	525560	Filtered	Filtered	Filtered	87175.2	Filtered	19612.9	41695	Filtered	Filtered	155526	Filtered	Filtered	Filtered	Filtered	Filtered	Filtered	119638	Filtered
Q61090;Q9JIP6	Frizzled-7;Frizzled-2	26925.1	52573.3	29031.8	30436.9	145510	23021.3	32294.8	72208.4	25645.5	68247.8	66618.4	Filtered	93505.2	Filtered	Filtered	26389.1	24628.8	Filtered	19106.5	130863	Filtered	11215.7	115228	3351.44	85168.2	153333	39426.7	59155.5	20734.9	21890.3
O88507	Ciliary neurotrophic factor receptor subunit alpha	25961.9	35936.9	19399.8	38103	21771.8	Filtered	22231.7	Filtered	15810.8	65660	23775.2	30961.9	Filtered	Filtered	21437.3	Filtered	Filtered	45733	42951.2	28453.7	33808.2	22015.4	Filtered	Filtered	43463	Filtered	66627.8	40395	Filtered	34913.5
Q00993	Tyrosine-protein kinase receptor UFO	22338.8	Filtered	Filtered	21205.1	Filtered	Filtered	Filtered	Filtered	1	22348.9	Filtered	Filtered	Filtered	Filtered	Filtered	769.409	Filtered	1	9050.74	Filtered	11037.2	17770.8	15095.5	5432.62	37199.9	4508.27	Filtered	Filtered	Filtered	1.04332
Q61543	Golgi apparatus protein 1	21649.9	29734.1	21179.7	29357.6	36812	27985.8	26672.1	28815.3	21790.2	17338.1	12899.6	Filtered	28845.7	Filtered	32336.5	30569.1	21997.5	21736	Filtered	28098.2	21614.5	Filtered	Filtered	14692.7	Filtered	22286	Filtered	17936.3	19395.1	30147.5
O35744	Chitinase-like protein 3	20414.4	Filtered	Filtered	Filtered	Filtered	Filtered	20234	Filtered	Filtered	Filtered	Filtered	Filtered	Filtered	Filtered	Filtered	Filtered	Filtered	Filtered	Filtered	Filtered	Filtered	Filtered	Filtered	Filtered	44903	Filtered	Filtered	Filtered	Filtered	Filtered
Q6IFX2	Keratin, type I cytoskeletal 42	20282.4	72606.5	89909.6	22426.5	83030.1	65074.1	1515.5	30343.2	Filtered	Filtered	Filtered	19477.5	Filtered	Filtered	Filtered	20979.9	80646	109196	20644.7	78023.7	68366.3	6084.43	61884.5	Filtered	Filtered	Filtered	42082.2	39409.7	6549.61	31132.9
P16125	L-lactate dehydrogenase B chain	20121.8	Filtered	Filtered	22193.3	Filtered	Filtered	28997.8	Filtered	1.09079e+06	Filtered	Filtered	Filtered	Filtered	Filtered	72764.8	29094.8	Filtered	27671.1	Filtered	7.0554e+06	Filtered	139177	Filtered	887785	Filtered	Filtered	Filtered	Filtered	30764	31117.8
P07141	Macrophage colony-stimulating factor 1	19997.2	Filtered	Filtered	64770.2	Filtered	Filtered	87297.4	Filtered	95050.3	126378	Filtered	Filtered	Filtered	Filtered	Filtered	98763.2	Filtered	120664	Filtered	Filtered	Filtered	40097.2	Filtered	85064.3	141393	Filtered	Filtered	Filtered	Filtered	67222.3
Q9ESY9	Gamma-interferon-inducible lysosomal thiol reductase	18788.1	Filtered	155764	159725	197260	Filtered	64025.7	182847	15910.1	140963	Filtered	Filtered	26623.1	Filtered	3752.56	29510.1	349165	189497	201790	Filtered	23298.3	72594.9	174003	8406.12	144986	Filtered	Filtered	29931.8	418156	7608.52
iRT-Kit_WR_fusion		18745.5	22395.9	Filtered	Filtered	73584888	77200584	Filtered	Filtered	Filtered	Filtered	975751	Filtered	129075384	Filtered	Filtered	1.00821e+06	Filtered	94440	Filtered	Filtered	Filtered	Filtered	Filtered	72029936	Filtered	21020.6	Filtered	112483672	58697.8	97042096
Q80YX1	Tenascin	16259.2	35674.5	30339.9	27989.1	50047.3	34147.5	16380.3	43466.9	41282.3	15407.4	10134.9	Filtered	42631.8	Filtered	12478.8	32898.3	31063.4	37986.4	36930.4	61106.4	35199.5	25798.2	42522.4	25505.4	28163.8	28256.7	24184	23295	23355.3	7125
P20029	78 kDa glucose-regulated protein	15944	Filtered	Filtered	Filtered	Filtered	19725.9	13859	29383	Filtered	80433.5	Filtered	35576.1	Filtered	Filtered	7437.43	40400.5	14664.5	9796.13	Filtered	1	8801.73	12243.2	13941	Filtered	114186	59599.5	73589.1	Filtered	Filtered	Filtered
Q91VU0	Protein FAM3C	15639.7	15694.2	20134.2	22331.1	8689.22	14514.9	17550.9	10237.9	6640.15	Filtered	7880.54	Filtered	11607.5	Filtered	15304.8	14113.5	Filtered	9876.73	19995.4	22329.7	16478.3	1	6371.47	1239.97	1.57867	3875.67	12685	13206.4	7116.49	9056.35
Q80XI7	Vomeromodulin	15377	Filtered	Filtered	37150.4	Filtered	Filtered	Filtered	218704	Filtered	26412.9	786.053	69090.6	126059	Filtered	Filtered	1	Filtered	11424.8	Filtered	Filtered	Filtered	Filtered	258104	Filtered	18692.6	Filtered	183284	56669.1	Filtered	Filtered
P62897	Cytochrome c, somatic	15124	Filtered	Filtered	1	Filtered	Filtered	16502.5	6686.01	128399	Filtered	Filtered	Filtered	Filtered	Filtered	Filtered	1594.2	Filtered	Filtered	7977.81	Filtered	Filtered	3047.4	22392.4	151234	26979.6	Filtered	Filtered	Filtered	Filtered	Filtered
Q9R045	Angiopoietin-related protein 2	14436	19556.3	24355	22066.4	21646.4	23828.4	11293.7	18335.4	17476.7	33355.7	8388.95	28421.1	32408.1	Filtered	37026.5	14530.9	Filtered	22310.1	27680.5	14480.6	10566.3	17140.1	25770.5	25678.2	42105	8390.87	Filtered	33204.2	22521	31093.6
P62806	Histone H4	14350.4	Filtered	184977	Filtered	84877	Filtered	161547	137466	1.21584e+06	Filtered	116284	75014.4	Filtered	Filtered	51109.7	Filtered	Filtered	199253	18955.4	76477.2	Filtered	153086	62890.7	1.7362e+06	Filtered	85380.5	Filtered	Filtered	62721	Filtered
O89023	Tripeptidyl-peptidase 1	13633.2	1	39273.6	19026.7	80330.3	Filtered	2875.67	Filtered	Filtered	Filtered	4758.86	Filtered	1.68601	Filtered	73649.9	4119.8	1	20913.5	13344.1	Filtered	11533.1	10216.7	16876.9	1	Filtered	Filtered	Filtered	Filtered	4791.64	38536.8
Q9R1Q9	V-type proton ATPase subunit S1	13424.1	Filtered	Filtered	Filtered	15194.8	Filtered	21855	6109.88	Filtered	Filtered	9541.93	Filtered	5442.65	Filtered	Filtered	40600.2	Filtered	Filtered	5602.11	Filtered	Filtered	19773.6	Filtered	Filtered	Filtered	Filtered	Filtered	Filtered	Filtered	Filtered
P35175	Stefin-1	12895.2	Filtered	201734	56995.3	257114	301814	59833.2	Filtered	151904	134655	37886.3	614814	Filtered	Filtered	95453.9	43285.5	Filtered	73359.3	15062.5	160479	294105	60624	Filtered	179532	64650.8	Filtered	611076	224229	226821	85687.9
Q61391	Neprilysin	12643.8	Filtered	Filtered	1.23082	Filtered	3.20938	31270.2	12414.1	2.09813	1	Filtered	3.45152	Filtered	Filtered	Filtered	19751.5	Filtered	2.35059	Filtered	Filtered	Filtered	12704.3	Filtered	Filtered	Filtered	2.25986	3.09594	Filtered	2.88505	Filtered
Q9Z1N6	Secreted frizzled-related sequence protein 4	11526.6	6337.18	13968	19281.6	15389.2	18429	6200.27	Filtered	7892.2	Filtered	12735.5	15092.2	6283.16	Filtered	16378.7	15555.6	Filtered	16260.1	15487.5	21895.5	20415.2	7434.82	3500.37	9084.26	5008.73	7554.03	12426.5	6466.21	11873.3	10361.5
Q8VC60	Beta-galactosidase-1-like protein	10939.6	Filtered	Filtered	52157.2	Filtered	Filtered	24848.1	47696.6	Filtered	1	23233.9	Filtered	Filtered	3.88023e+06	Filtered	33521.8	Filtered	23455.6	31117.5	Filtered	Filtered	18514.5	Filtered	Filtered	Filtered	Filtered	Filtered	Filtered	55513.5	Filtered
P17751	Triosephosphate isomerase	10641.7	Filtered	50928.2	Filtered	Filtered	Filtered	27552.9	21584.9	128615	Filtered	Filtered	Filtered	Filtered	1.62614	21093.2	Filtered	Filtered	32866.1	Filtered	Filtered	Filtered	18134.9	Filtered	165781	Filtered	Filtered	Filtered	Filtered	42946.3	32872.1
Q01721	Growth arrest-specific protein 1	9354.14	Filtered	30765.3	26992.5	Filtered	27669	10023.6	20469.2	5789.68	8947.45	25889.7	37480.1	9809.72	Filtered	9120.72	26013.2	10446.4	36717.3	Filtered	13669.3	21273.5	7911.16	43006.3	25687.8	22036.7	11166.4	16568.9	Filtered	18365.9	Filtered
P11680	Properdin	8632.62	1	1.09416	2335.85	381.813	1	13689.7	1003.88	4944.99	5048.62	5069.2	1	Filtered	Filtered	702.043	3174.08	1	1496.15	3066.39	1	2241.38	15033.2	5320.04	19534.2	5586.63	1	1	Filtered	1	1.22217
O55188	Dentin matrix acidic phosphoprotein 1	8538.94	Filtered	3780.07	7073.17	13842.3	Filtered	6250.42	4416.37	13097	30532.5	17377.3	32852.9	12701.6	Filtered	5847.96	16019.7	16687.4	7060.37	21794.3	18655.9	13514.5	17109.2	Filtered	24970.6	40698.9	22997.9	46219.2	14944.1	9028.27	5276.83
Q9WVJ3	Carboxypeptidase Q	8512.16	62708.8	588777	75481	Filtered	392481	25548.9	Filtered	63678.5	Filtered	43355	379889	Filtered	65355.9	Filtered	137246	Filtered	359998	205847	239383	639531	88717.9	57490	82680.8	105112	89215.6	502574	558655	283805	Filtered
Q99N23	Carbonic anhydrase 15	8482.42	Filtered	661.526	Filtered	28915.9	1022.99	118.576	18302	1	1689.79	56089.6	1.22225	44786.3	Filtered	Filtered	4516.04	Filtered	5978.43	3505.04	1800.28	Filtered	2052.34	27765.6	3633.9	2742.39	30577.7	Filtered	29993.2	460.695	Filtered
Q9JJS0	Signal peptide, CUB and EGF-like domain-containing protein 2	7210.07	2236.02	Filtered	7085.36	2877.92	Filtered	5824.4	Filtered	6038.64	10727.8	6850.07	7287.72	Filtered	Filtered	7379.76	8226.37	Filtered	Filtered	Filtered	7220.33	Filtered	3787.88	1	3698.34	Filtered	3113.55	Filtered	Filtered	6740.2	14168.3
P01844;P01845	Ig lambda-2 chain C region;Ig lambda-3 chain C region	6587.08	1	1	3232.51	1	Filtered	Filtered	1	Filtered	Filtered	1	Filtered	Filtered	Filtered	Filtered	1	Filtered	Filtered	4980.3	1	Filtered	Filtered	Filtered	Filtered	Filtered	1	Filtered	Filtered	Filtered	Filtered
P29788	Vitronectin	5080.09	1626.21	3530.98	Filtered	8033.48	72862.7	2592.34	Filtered	7887.56	7423.39	167968	11778.9	Filtered	Filtered	10417.9	9503.31	Filtered	1	4999.56	3122.52	1.01855	216160	Filtered	346606	423079	5302.67	Filtered	Filtered	8746.36	12519.1
Q64487	Receptor-type tyrosine-protein phosphatase delta	5022.59	1.43241e+06	413738	127683	794865	1.04235e+06	Filtered	368405	981132	Filtered	Filtered	1.44108e+06	3747338	923965	1.34568e+06	360044	1.29156e+06	307054	Filtered	911044	459984	26993.5	1.27022	871393	508631	Filtered	1452520	2.17426e+06	1.11039e+06	859701
P11835	Integrin beta-2	1803.47	Filtered	712.006	530.663	Filtered	Filtered	3395.1	Filtered	4916.62	Filtered	5004.32	Filtered	Filtered	Filtered	Filtered	3252.72	Filtered	2357.94	Filtered	1815.98	5054.02	8057.71	Filtered	7177.28	Filtered	Filtered	Filtered	Filtered	Filtered	Filtered
Q99LJ1	Tissue alpha-L-fucosidase	1636.55	5833.32	253749	112356	4206.52	Filtered	1992.2	249729	65977.4	167963	Filtered	95950.6	251311	532148	10397.9	73434	Filtered	304400	150879	Filtered	Filtered	154846	Filtered	Filtered	Filtered	86303.6	Filtered	Filtered	1.38074e+06	4080.25
Q8CIF4	Biotinidase	1627.9	12259.4	220996	Filtered	6049.91	Filtered	39223.7	209681	59595.5	228035	120868	38067.1	185012	Filtered	133450	Filtered	Filtered	Filtered	125987	Filtered	1	8019.66	177853	136950	92541.2	Filtered	Filtered	182059	Filtered	38148.7
Q60997	Deleted in malignant brain tumors 1 protein	1	1.85668	1.98314	1.40882	19682.4	2.48726	56795.2	663676	1.00152e+06	1.46758	1.43559	3.23629	2.82415	4.78227	2.33905	1	1.8631	1.83994	1.4064	2.53353	2.84203	32751.2	535487	1.1219e+06	1.24993	Filtered	2.83128	2.41404	2.37163	1.74818
Q8BGB7	Enolase-phosphatase E1	1	Filtered	Filtered	Filtered	Filtered	Filtered	46242.2	Filtered	1	43537.7	Filtered	Filtered	Filtered	Filtered	Filtered	1142.04	Filtered	Filtered	Filtered	Filtered	Filtered	2707.18	Filtered	60755.4	105204	Filtered	Filtered	Filtered	Filtered	Filtered
